1 **Herpes simplex virus-1 pUL56 degrades GOPC to alter the**  
2 **plasma membrane proteome**

3

4 <sup>1,2</sup>Timothy K. Soh

5 <sup>1,3</sup>Colin T. R. Davies

6 <sup>1,2</sup>Julia Muenzner

7 <sup>2</sup>Viv Connor

8 <sup>2</sup>Clément R. Bouton

9 <sup>2</sup>Henry G. Barrow

10 <sup>2</sup>Cameron Smith

11 <sup>2</sup>Edward Emmott

12 <sup>3</sup>Robin Antrobus

13 <sup>2,4</sup>Stephen C. Graham

14 <sup>3,4</sup>Michael P. Weekes

15 <sup>\*2,4,5</sup>Colin M. Crump

16

17 <sup>1</sup>These authors contributed equally

18 <sup>2</sup>Division of Virology, Department of Pathology, Cambridge University, Cambridge, CB2

19 1QP, UK

20 <sup>3</sup>Cambridge Institute for Medical Research, Cambridge University, Cambridge, CB2

21 0XY, UK

22 <sup>4</sup>Senior author

23 <sup>5</sup>Lead Contact.

24 \*Correspondence: [cmc56@cam.ac.uk](mailto:cmc56@cam.ac.uk)

25

26

27 **Keywords:** Herpesvirus, Virus host interaction, Immune evasion, Membrane trafficking,

28 Proteasomal degradation, Quantitative proteomics, Uncharacterized ORF

29

## 30 **Summary**

31 Herpesviruses are ubiquitous in the human population and they extensively remodel the  
32 cellular environment during infection. Multiplexed quantitative proteomic analysis over a  
33 whole time-course of herpes simplex virus (HSV)-1 infection was used to characterize  
34 changes in the host-cell proteome and to probe the kinetics of viral protein production.  
35 Several host-cell proteins were targeted for rapid degradation by HSV-1, including the  
36 cellular trafficking factor GOPC. We identify that the poorly-characterized HSV-1 protein  
37 pUL56 binds directly to GOPC, stimulating its ubiquitination and proteasomal  
38 degradation. Plasma membrane profiling revealed that pUL56 mediates specific changes  
39 to the surface proteome of infected cells, including loss of IL18 receptor and Toll-like  
40 receptor 2, and delivery of Toll-like receptor 2 to the cell-surface requires GOPC. Our  
41 study highlights an unanticipated and efficient mechanism whereby a single virus protein  
42 targets a cellular trafficking factor to modify the abundance of multiple signaling molecules  
43 at the surface of infected cells.

44

## 45 **Introduction**

46 Herpesviruses are ubiquitous in the human population and are characterized by  
47 an ability to establish lifelong infections. Greater than two thirds of the world population  
48 are estimated to be infected with HSV-1 and HSV-2 (Looker et al., 2008; Looker et al.,  
49 2015). These infections are generally asymptomatic or give rise to mild symptoms  
50 following viral reactivation (oral or genital sores), although they can cause severe  
51 diseases of the eye (herpes keratitis), central nervous system (herpes encephalitis), or  
52 systemic infections in those with compromised or immature immune systems (Gnann and  
53 Whitley, 2017; Koujah et al., 2019; Pinninti and Kimberlin, 2018).

54 The replication cycle of herpesviruses entails a complex and carefully controlled  
55 transcriptional cascade of viral genes that function both to generate infectious particles  
56 and to modulate host factors. HSV-1 genes are conventionally separated into three broad  
57 temporal classes (immediate-early, early, and late), where proteins expressed earliest  
58 during infection serve as transcription factors and/or modulate the host-cell environment  
59 and immune responses, while those expressed late are structural components of the  
60 virion. The best-studied HSV-1 immunomodulatory proteins are infected cell protein 0  
61 (ICP0) and virion host shutoff protein (vhs). These proteins are known to modulate the  
62 host-cell proteome by suppressing the expression and/or promoting the degradation of  
63 various host proteins (Boutell et al., 2011; Chelbi-Alix and de The, 1999; Jiang et al.,  
64 2016; Lees-Miller et al., 1996; Lilley et al., 2011; Orzalli et al., 2013; Su and Zheng, 2017;  
65 Zenner et al., 2013). However, the global temporal effects of HSV-1 replication on the  
66 host proteome remain poorly characterized. To date there has been one large-scale  
67 proteomic analysis of HSV-1 infection. This work, performed in fibroblasts, quantified the

68 abundance of approximately 4000 host proteins and characterized changes in protein  
69 post-translational modification following infection (Kulej et al., 2017). However, the  
70 molecular mechanisms underlying these changes were not characterized.

71 We developed quantitative temporal viromics (QTV) as a method to enable highly-  
72 multiplexed quantitative analysis of temporal changes in host and viral proteins  
73 throughout the course of a productive infection (Weekes et al., 2014). QTV employs  
74 tandem mass tags (TMT) and MS3 mass spectrometry to facilitate precise quantitation of  
75 each protein, and we have applied this technique to study several viruses including  
76 human cytomegalovirus (HCMV), Epstein-Barr virus, vaccinia virus, and BK polyomavirus  
77 (Caller et al., 2019; Ersing et al., 2017; Soday et al., 2019; Weekes et al., 2014).

78 We have now performed QTV analysis throughout a single replication cycle of  
79 HSV-1 in human keratinocytes, the natural target of HSV-1 lytic infection. At each time  
80 point we quantified almost 7000 human proteins and >90% of canonical HSV-1 proteins,  
81 and we have found evidence for protein expression from 17 novel HSV-1 open reading  
82 frames (ORFs). We have identified host proteins that are rapidly degraded by HSV-1,  
83 including the cellular trafficking factor Golgi associated PDZ and Coiled-coil motif  
84 containing protein (GOPC). Further, we demonstrate that GOPC degradation is mediated  
85 by the poorly-characterized HSV-1 protein pUL56. Plasma membrane profiling and flow  
86 cytometry show that pUL56-mediated degradation of GOPC reduces the cell-surface  
87 abundance of multiple host proteins, including the immune signaling molecule Toll-like  
88 receptor 2 (TLR2). This highlights an unanticipated and highly-efficient mechanism  
89 whereby HSV-1 specifically targets a cellular trafficking factor in order to manipulate the  
90 abundance of multiple proteins on the surface of infected cells.

## 91 **Results**

### 92 Quantitative Temporal Viromic study of HSV-1 infection

93 To construct an unbiased global picture of changes in host and viral proteins  
94 throughout the course of HSV-1 infection, we infected human keratinocyte cells (HaCaT)  
95 with HSV-1 at a high multiplicity of infection (10 PFU/cell) (Figure 1, Table S1).  
96 Immunofluorescence analysis of parallel samples confirmed that >95% of cells were  
97 infected. Ten-plex TMT and MS3 mass spectrometry were used to quantify changes in  
98 protein expression over seven time points (Figure 1A). A particular advantage of such  
99 TMT-based quantitation is the measurement of each protein at every time point. This  
100 generated the most complete proteomic dataset examining the lytic replication cycle of  
101 HSV-1 to date, quantifying 6956 human proteins and 67/74 canonical HSV-1 proteins,  
102 and provided a global view of changes in protein expression during infection.

103 Temporal analysis of viral protein expression over the whole course of infection  
104 can provide a complementary system of protein classification, in addition to enabling  
105 direct correlation between viral and cellular protein profiles to give insights into viral-host  
106 protein interaction (Soday et al., 2019; Weekes et al., 2014). The number of classes of  
107 viral protein expression was determined by clustering viral proteins using the k-means  
108 method. This identified at least five distinct temporal protein profiles of viral protein  
109 expression (Figure S1, Table S1). Furthermore, by searching data against a 6-frame  
110 translation of the HSV-1 strain used (KOS), eight putative new HSV-1 proteins (6FT-  
111 ORFs) that increased in abundance over the course of infection were identified (Figure  
112 S2A; Table S1).

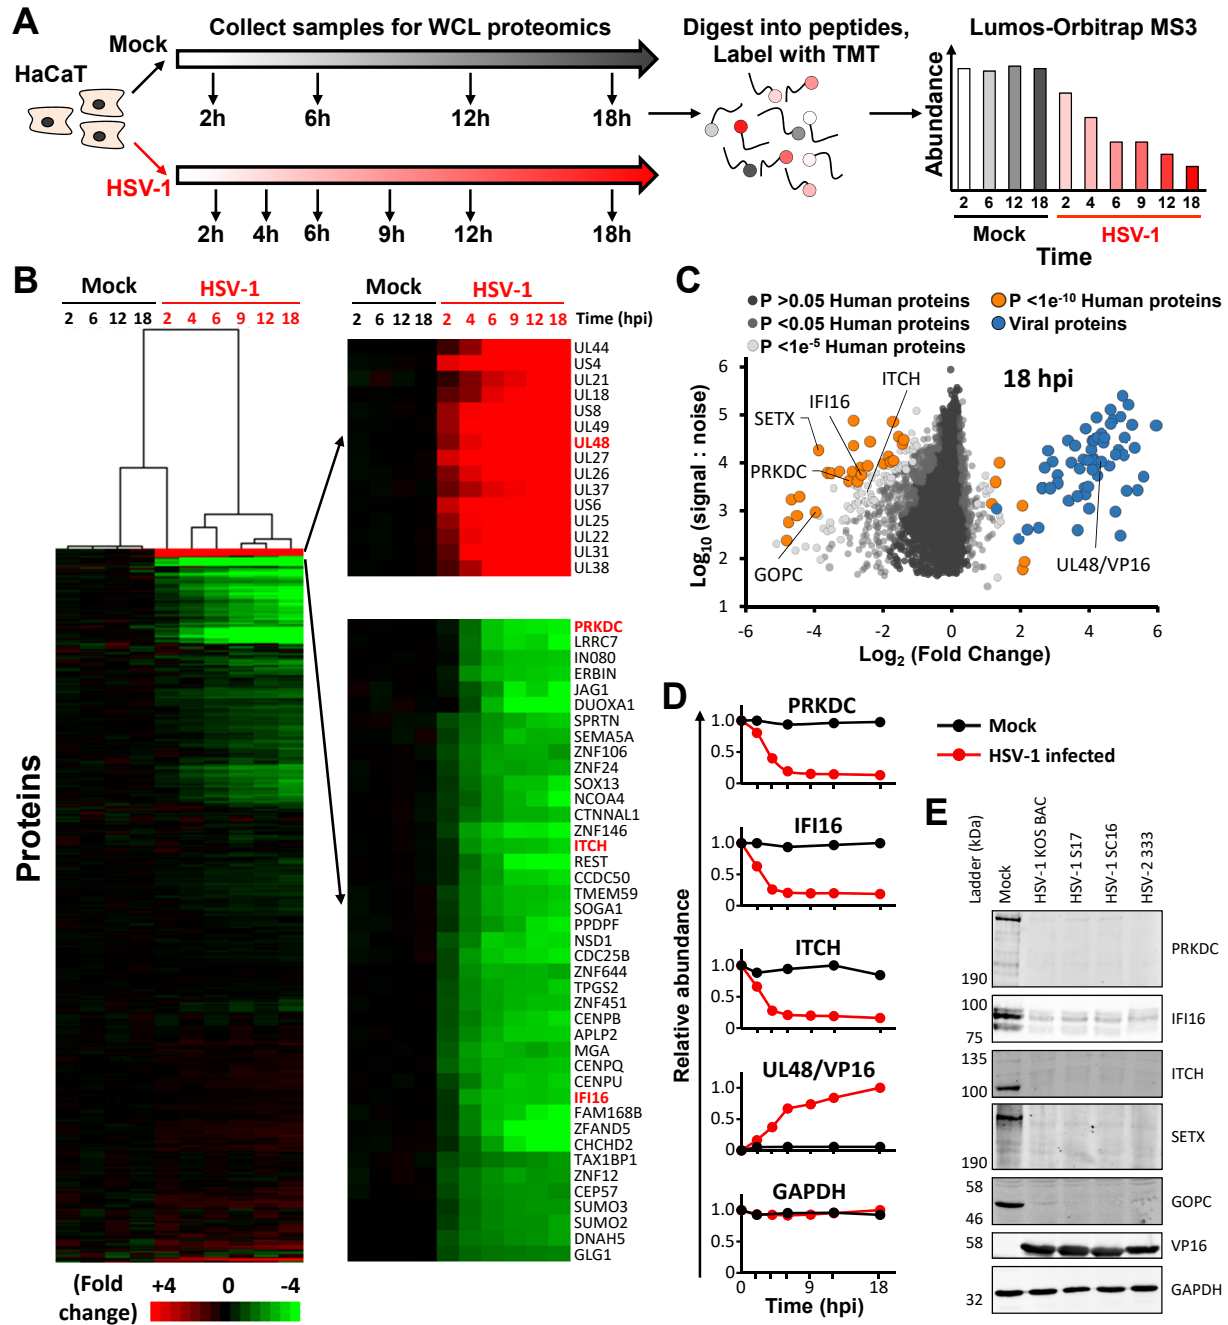

113

114 **Figure 1: Quantitative temporal analysis of HSV infection**

115 **A.** Schematic of the experimental workflow. HaCaT cells were infected at MOI of 10 or mock infected.  
 116 Samples were harvested at the stated times and processed for quantitative proteomic analysis. **B.**  
 117 Hierarchical cluster analysis of all proteins quantified. An enlargement of two subclusters is shown in the  
 118 right panel, including multiple proteins that were substantially up- or downregulated. **C.** Scatter plot of all  
 119 proteins quantified at 18 hpi. Fold change is shown in comparison to the average of the mock samples.  
 120 Benjamini-Hochberg-corrected significance B was used to estimate p-values (Cox and Mann, 2008). **D.**  
 121 Example temporal profiles for known controls. **E.** Validation of temporal profiles shown in (D) by immunoblot  
 122 of lysates from HaCaT cells infected with a range of HSV strains (MOI of 5 with HSV-1 strains KOS, S17  
 123 and SC16, and HSV-2 strain 333).

124 HSV-1 infection led to >2-fold downregulation of 496 human proteins and >2-fold  
125 upregulation of 34 proteins. Mock and immediate early (2h) infection samples clustered  
126 separately from early (4, 6h) and late (9, 12, 18h) infection time points. Changes of the  
127 greatest magnitude primarily occurred late during infection, as might be expected for a  
128 virus with a potent host shutoff activity (Figure 1B). This effect can be observed by a  
129 general shift to the left in a scatterplot of fold change (Figure 1C). Multiple host targets  
130 known to be specifically downregulated during HSV-1 infection were confirmed, including  
131 DNA PKcs (PRKDC) (Lees-Miller et al., 1996; Parkinson et al., 1999), Interferon Gamma  
132 Inducible Protein 16 (IFI16) (Orzalli et al., 2012), Promyelocytic Leukemia (PML) (Chelbi-  
133 Alix and de The, 1999), Tripartite Motif Containing 27 (TRIM27) (Conwell et al., 2015),  
134 Nucleus Accumbens Associated 1 (NACC1) (Sloan et al., 2015), and MORC Family CW-  
135 Type Zinc Finger 3 (MORC3) (Sloan et al., 2015) (Figure 1D, Figure 2D and Table S1).  
136 Proteomic data was validated by comparison to immunoblot analysis of cells infected for  
137 16 h with three independent strains of HSV-1 and with HSV-2, which suggested that many  
138 of the changes observed were conserved phenotypes (Figure 1E). All data are shown in  
139 Table S1, in which the “Plotter” worksheet facilitates interactive generation of temporal  
140 graphs of expression of each of the human or viral proteins quantified.

141

#### 142 Bioinformatic enrichment analysis of HSV-1 infection

143 DAVID software (Huang da et al., 2009) was used to identify pathways significantly  
144 enriched among proteins downregulated >2-fold (Figure 2A). Several of these pathways  
145 are known to influence HSV-1 infection, for example cell cycle associated proteins such  
146 as cyclin dependent kinases (Schang et al., 1998) and a range of DNA damage response

147 pathways [reviewed in (Smith and Weller, 2015)]. The ubiquitin-like (Ubl) conjugation  
 148 pathway was significantly enriched, consistent with the known targeting of certain  
 149 pathway components by herpesviruses to direct cellular prey for degradation. For  
 150 example, three SUMO family members were downregulated during infection (the fourth  
 151 was not quantified) (Figure 2B). Components of each enriched cluster are shown in Table  
 152 S2. A similar analysis of host proteins upregulated >2-fold did not reveal any enriched  
 153 clusters.

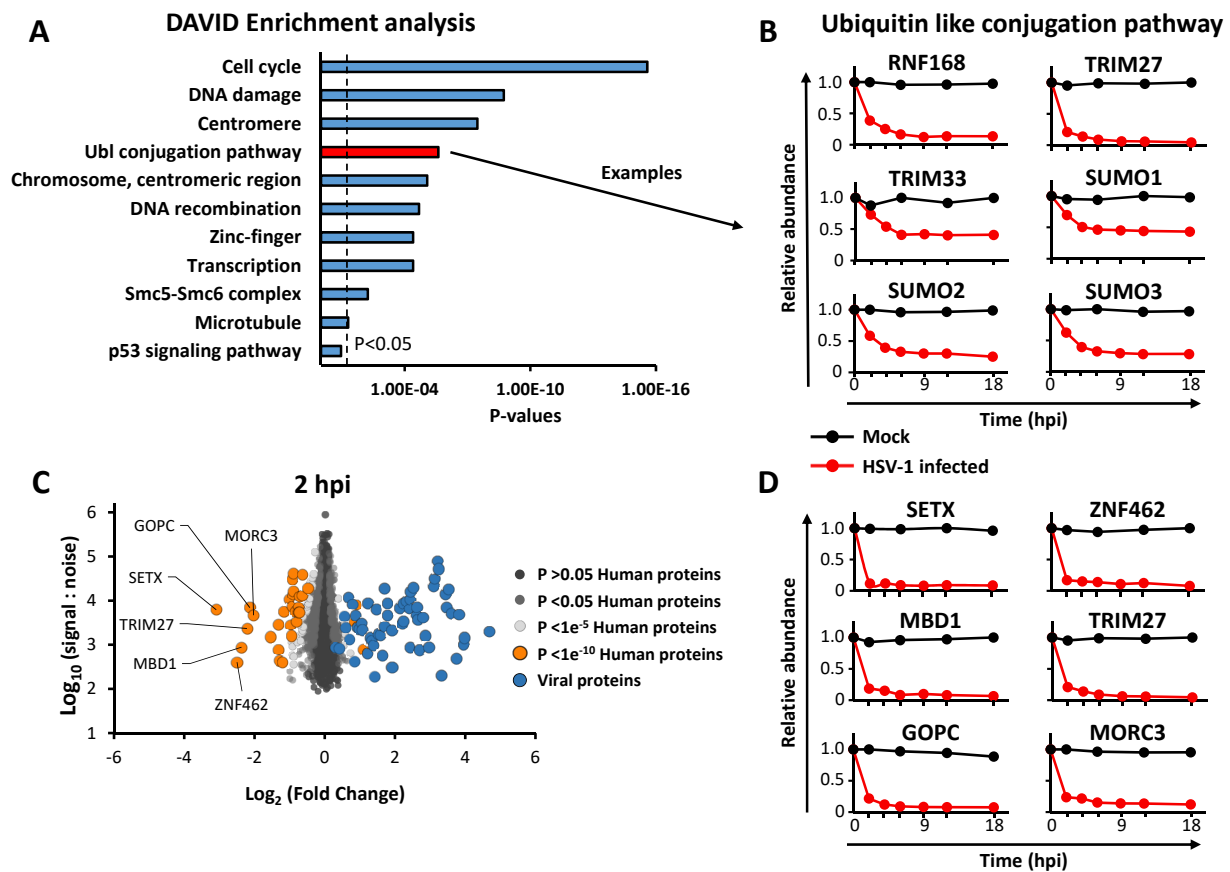

154  
 155 **Figure 2: Manipulation of cell host pathways during HSV infection**  
 156 **A.** DAVID enrichment analysis of all human proteins downregulated >2-fold at any point during infection  
 157 compared to an average of the four mock samples. A background of all 6956 quantified human proteins  
 158 was used. Shown are representative terms from each cluster with Benjamini-Hochberg corrected p-values  
 159 of <0.05. Components of each enriched cluster are shown in Table S2. A similar analysis was performed  
 160 for proteins upregulated >2 fold, however this did not reveal any significant enrichment. **B.** Example  
 161 temporal profiles of proteins downregulated from the ubiquitin like (Ubl) conjugation pathway. **C.** Scatter  
 162 plot of all proteins quantified at 2 hpi. Fold change is shown in comparison to the average of the mock  
 163 samples. Benjamini-Hochberg-corrected significance B was used to estimate p-values (Cox and Mann,  
 164 2008). **D.** Temporal profiles of all proteins downregulated during HSV infection >4-fold at 2 hpi.



165 Identification of host targets most rapidly depleted following HSV-1 infection

166       Based on the premise that host proteins downregulated early during viral infection  
167 are likely to be enriched in factors with antiviral activity, we analyzed proteins  
168 downregulated >4-fold at the earliest timepoint after HSV-1 infection (2 hours post  
169 infection (hpi); Figure 1C-D). Of the six proteins thus identified, four have previously been  
170 shown to be reduced significantly in HSV-1 infected cells (Methyl-CpG Binding Domain  
171 Protein 1 (MBD1), MORC3, TRIM27 and Zinc Finger Protein 462 (ZNF462)), of which  
172 three were shown to be modulated in an ICP0-dependent manner (MBD1, MORC3, and  
173 TRIM27) (Conwell et al., 2015; Sloan et al., 2015). The other two proteins (Senataxin  
174 (SETX) and GOPC) have not been previously identified as targets of HSV-1 mediated  
175 degradation.

176

177 pUL56 binds NEDD4 family of ubiquitin ligases and GOPC

178       ITCH, a member of the NEDD4 family of ubiquitin ligases, was rapidly depleted  
179 during HSV-1 infection (Figure 1B-D). pUL56 proteins from HSV-1 and HSV-2 interact  
180 with ITCH and NEDD4, leading to proteasomal degradation of these targets (Ushijima et  
181 al., 2008; Ushijima et al., 2010). pUL56 is a tail-anchored type-II membrane protein found  
182 in purified virions (Koshizuka et al., 2002) and contains three PPXY motifs that interact  
183 with NEDD4, likely by binding to WW domains (Ushijima et al., 2008). Notably, pUL56  
184 does not contain any lysine residues and is thus likely to be refractory to ubiquitination.  
185 To further characterize the cellular binding partners of pUL56, stable isotope labelling of  
186 amino acids in cell culture (SILAC) immunoprecipitation–mass spectrometry (IP-MS)  
187 analysis was performed using cells expressing GFP-tagged pUL56 or GFP alone (Figures

188 3A and S3, Table S3). Several members of the NEDD4 family of ubiquitin ligases were  
189 enriched in the pUL56 IP, as were multiple Trafficking Protein Particle Complex II  
190 (TRAPPCII) subunits. Strikingly, GOPC was also identified as a binding partner of pUL56.  
191 Co-precipitation assays demonstrated that the purified GST-tagged pUL56 cytoplasmic  
192 domain (residues 1-207) is capable of binding purified GOPC, confirming that these two  
193 proteins interact directly (Figure 3B). The N-terminal coiled-coil domain of GOPC  
194 mediates its recruitment to the Golgi via an interaction with Golgin-160 (Hicks and  
195 Machamer, 2005), whereas the PDZ domain mediates interactions with C-terminal PDZ-  
196 binding motifs of cellular partner proteins (Yao et al., 2001). Truncation of GOPC showed  
197 that residues 27-236, comprising the N-terminal coiled-coil region, are sufficient to bind  
198 to pUL56 (Figure 3C). Immunoprecipitation experiments conducted with cells expressing  
199 truncated forms of pUL56 demonstrated that residues 1-157 of pUL56 can mediate  
200 efficient binding to GOPC whereas residues 1-104 do not, suggesting that a binding site  
201 for GOPC may reside within the 53 amino acid sequence between pUL56 residues 105-  
202 157 (Figure 3C). Taken together, these results suggest a model whereby pUL56 binds  
203 both GOPC and NEDD4-family of ubiquitin ligases, bringing them in close proximity and  
204 thus stimulating the ubiquitination and proteolytic degradation of GOPC.

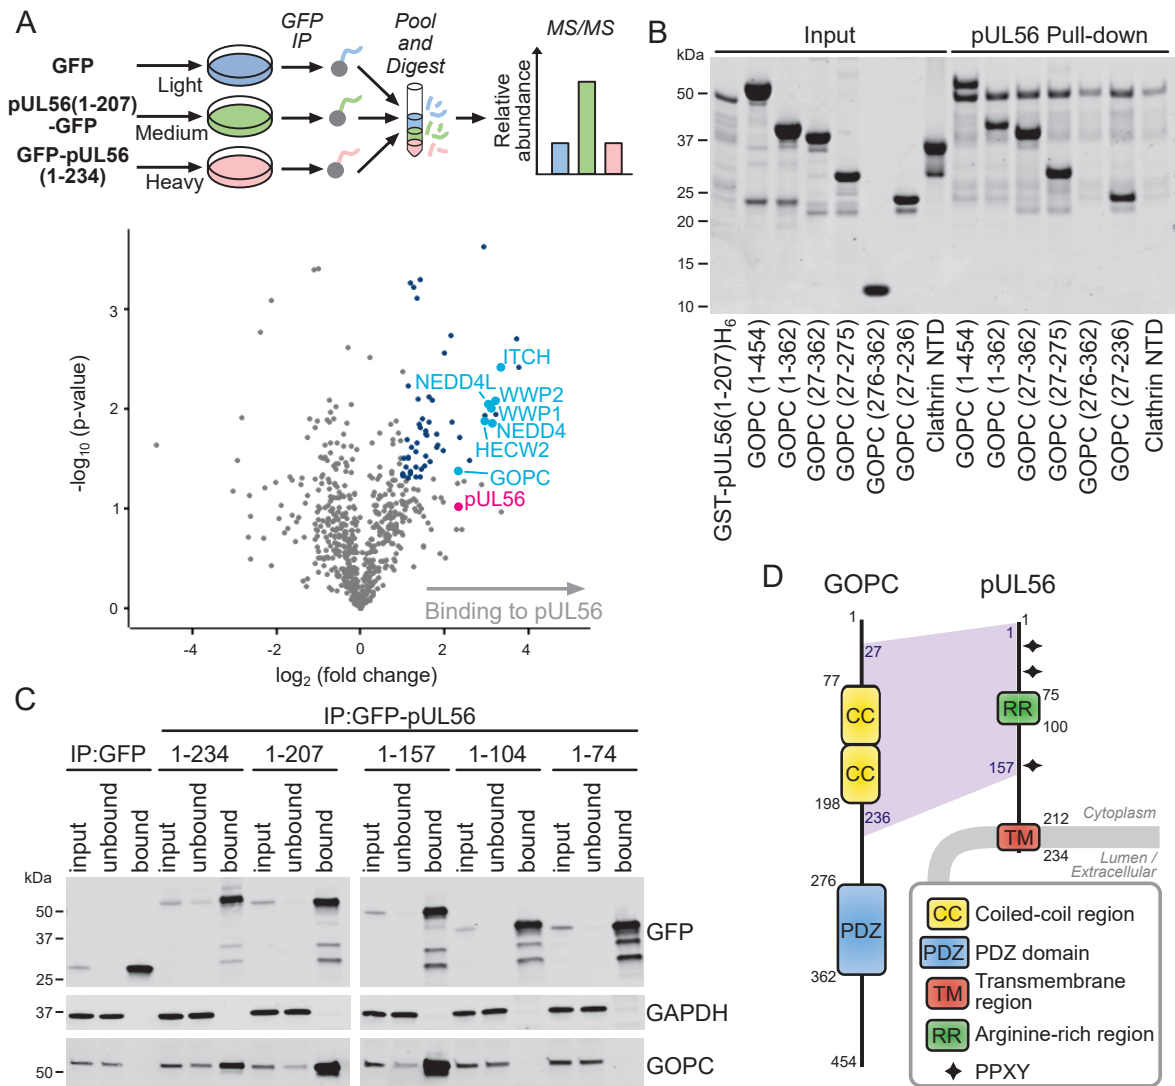

205

206 **Figure 3: pUL56 binds GOPC and cellular ubiquitin ligases**

207 **A.** SILAC-labelled HEK293T cells were transfected with GFP-tagged pUL56 cytoplasmic domain (residues  
 208 1-207) or GFP alone and subjected to immunoprecipitation (IP) using a GFP affinity resin. In the volcano  
 209 plot, the horizontal-axis shows average fold enrichment in IP of pUL56(1-207)-GFP compared to GFP  
 210 across three biological replicates and the vertical axis shows significance (two sided t-test) across the three  
 211 replicates. Significantly enriched proteins (>2-fold enrichment and  $p < 0.05$ ) are colored blue and selected  
 212 proteins are annotated. **B.** Pull-down experiment using purified recombinant components, demonstrating  
 213 that the GST-tagged pUL56 cytoplasmic domain interacts directly with the coiled-coil region of GOPC. The  
 214 peptide-binding N-terminal domain of clathrin heavy chain (Clathrin NTD) and GST were used as control  
 215 prey and bait proteins, respectively. **C.** Co-IP of GOPC with GFP-tagged pUL56 and truncations thereof.  
 216 Immunoblots were stained with the antibodies shown. **D.** Schematic representation of pUL56 and GOPC.

217

218 pUL56 mediates degradation of GOPC via the proteasome

219 To identify the mechanism of GOPC degradation, cells were infected with wild-type  
220 (WT) HSV-1 or HSV-1 lacking expression of pUL56 ( $\Delta$ UL56). Viruses lacking expression  
221 of the viral proteins ICP0 ( $\Delta$ ICP0) or vhs ( $\Delta$ vhs) were also included, as both are known to  
222 deplete host proteins. Cells were further treated with or without the proteasomal inhibitor  
223 MG132. GOPC was degraded during HSV-1 infection in a pUL56-dependent and MG132-  
224 inhibitable fashion, whereas GOPC degradation was independent of both ICP0 and vhs  
225 (Figure 4A-B). Expression of pUL56 by transfection or in an inducible cell line  
226 demonstrated that this protein is sufficient for GOPC degradation in the absence of other  
227 HSV-1 factors (Figures 4C-D). HSV-1 pUL56 contains three PPXY motifs, which mediate  
228 interaction with NEDD4 family of E3 ubiquitin ligases (Ushijima et al., 2010). To test the  
229 importance of these PPXY motifs in pUL56 for GOPC degradation a recombinant virus  
230 was generated in which all three motifs were mutated to AAXA. This triple mutant  
231 phenocopied the deletion virus, failing to degrade GOPC even though pUL56 expression  
232 was maintained (Figure 4E). Overall, these data suggest that pUL56 recruits NEDD4  
233 family ubiquitin ligases to mediate the proteasomal degradation of GOPC.

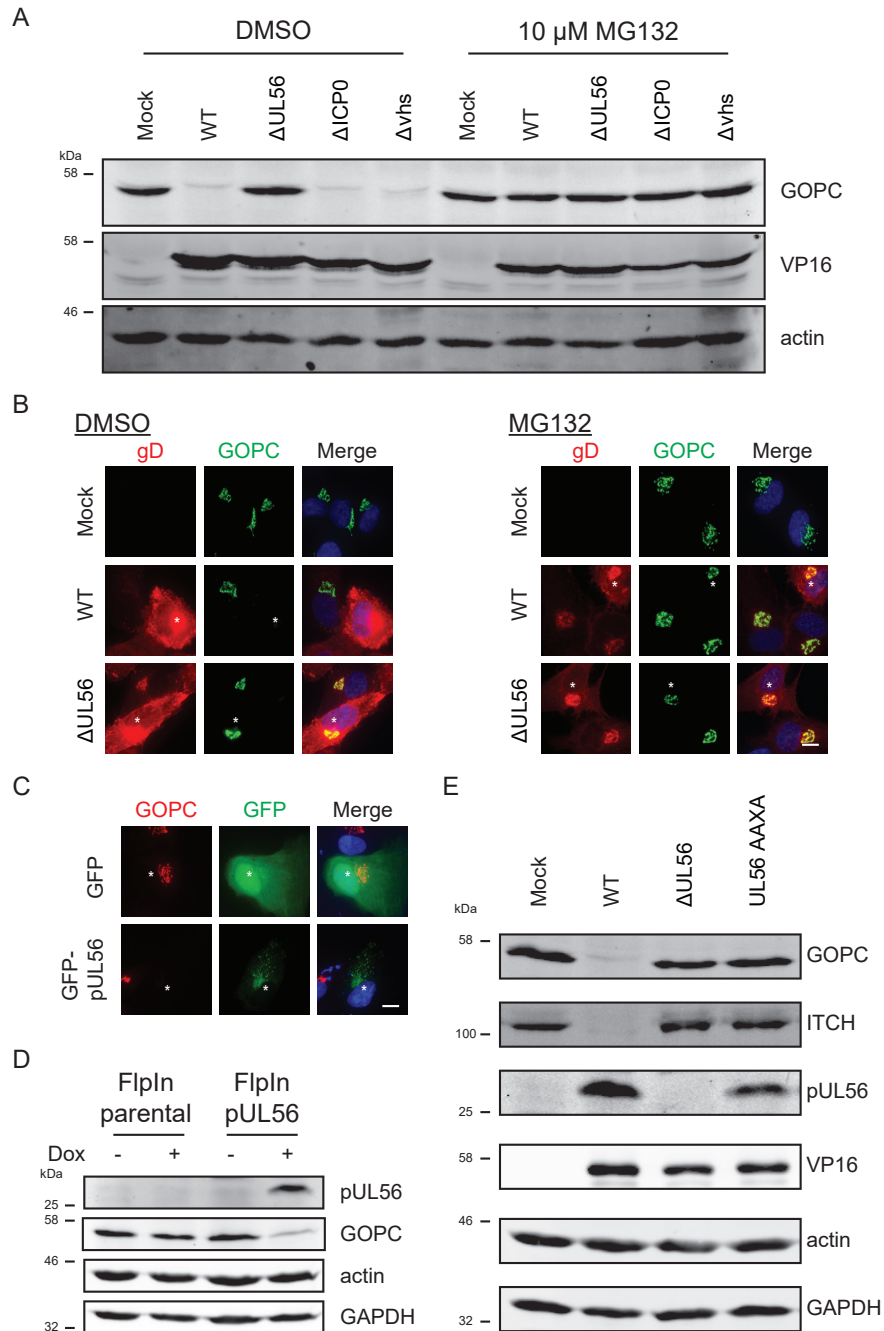

234

235 **Figure 4: pUL56 is necessary and sufficient for GOPC degradation**

236 **A.** HaCaT cells were infected at MOI of 10 with the indicated virus. After 2 h, media was replaced with 10  
 237  $\mu$ M MG132 or carrier (DMSO) in DMEM for the remainder of the infection. Cell lysates were harvested 16  
 238 hpi. **B.** HFF hTERT cells were infected at MOI of 1 then treated with MG132 or carrier as described in (A).  
 239 At 6 hpi, samples were fixed and stained for GOPC (green) and the infection control gD (red). The merge  
 240 includes DAPI (blue) and the scale bar represents 10  $\mu$ m. **C.** HFF cells were transfected with pUL56-GFP.  
 241 One day post-transfection cells were fixed and stained for GOPC (red). The merge includes DAPI (blue)  
 242 and the scale bar represents 10  $\mu$ m. **D.** Expression of pUL56 was induced with doxycycline in a clonal 293  
 243 FlpIn cell line. Cell lysates were harvested 1 day after induction. **E.** HaCaT cells were infected at MOI of 10  
 244 with the indicated virus and cell lysates were harvested 16 hpi.

245 Replication of HSV-1 in cell culture is independent of pUL56

246           The rapid depletion of GOPC from cells during HSV-1 infection implies that  
247 removal of this host protein may be important for efficient viral replication. However, HSV-  
248 1  $\Delta$ UL56, where endogenous levels of GOPC are maintained, demonstrated effectively  
249 identical growth kinetics to HSV-1 WT (Figure 5A). Plaque size analysis also  
250 demonstrated no defects in cell-to-cell spread for HSV-1  $\Delta$ UL56 compared to WT (Figure  
251 5B-C). These data demonstrate that pUL56 is dispensable for HSV replication in cell  
252 culture, consistent with previous reports (Ushijima et al., 2008). Given that viruses do not  
253 usually retain genes of no benefit, this suggests that pUL56 plays a role during viral  
254 replication *in vivo*, perhaps during establishment, maintenance, or reactivation from  
255 latency. Alternatively, pUL56 may be a virulence factor involved in modulating antiviral  
256 immune responses against HSV-1, as is the case for a number of herpesvirus proteins  
257 that are dispensable in cell culture but important for replication *in vivo*, for example vhs  
258 (Strelow and Leib, 1995).

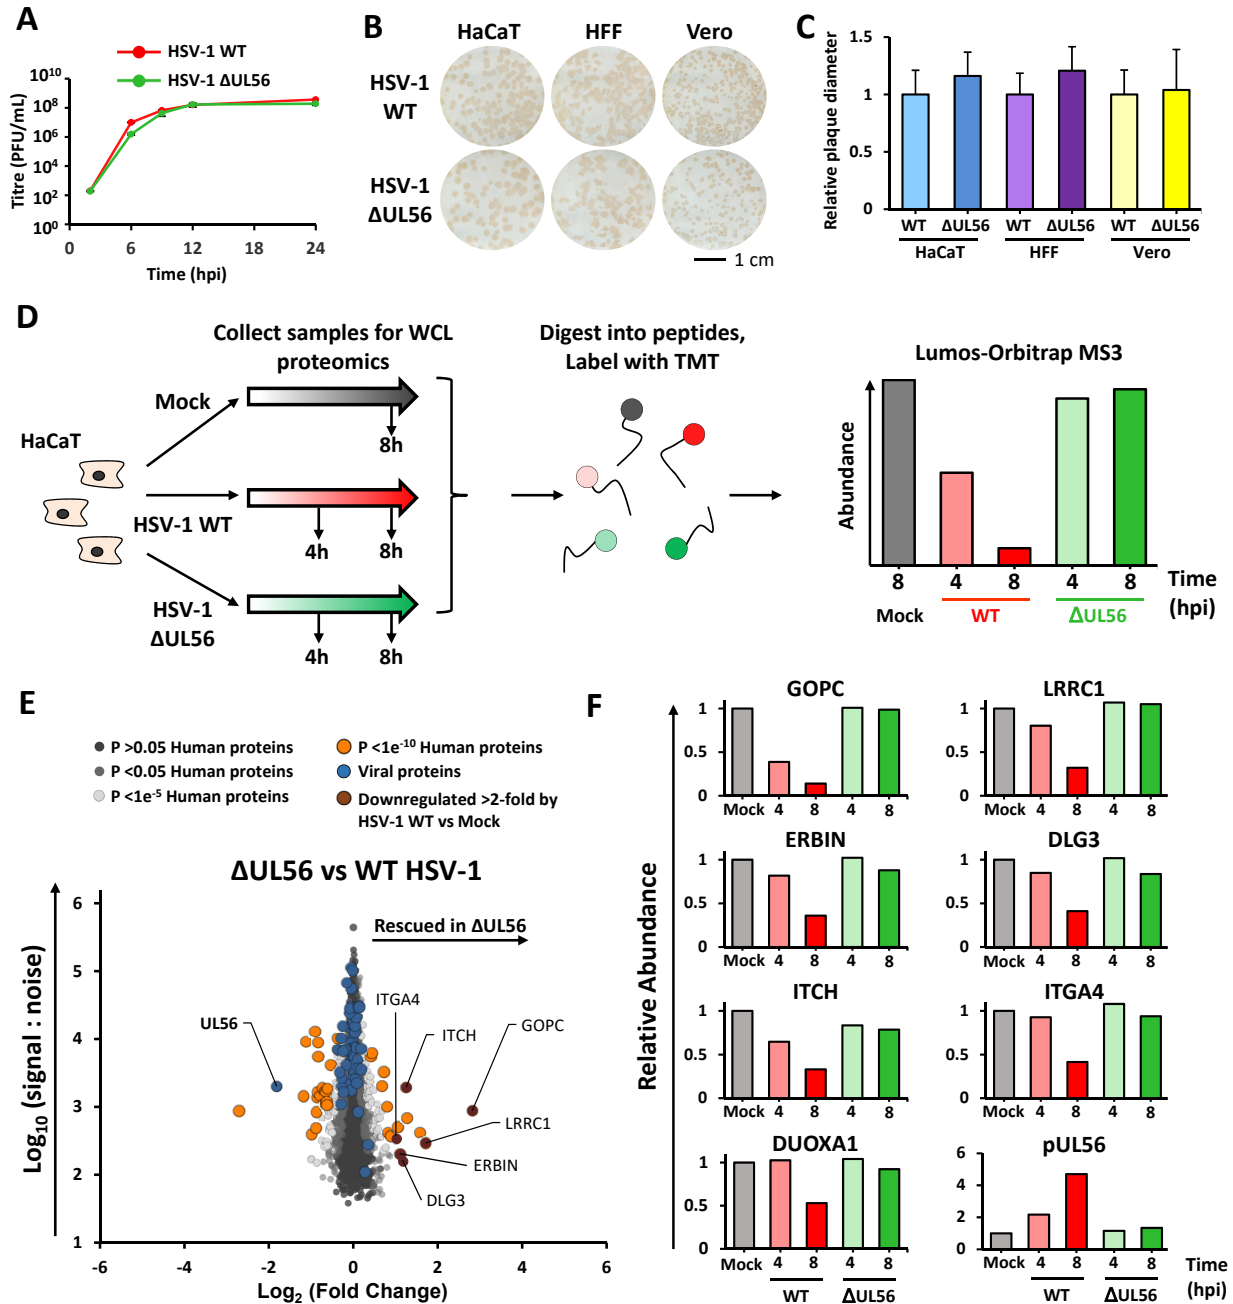

259

260 **Figure 5: Identification of pUL56 degradation targets**

261 **A.** HaCaT cells were infected at MOI of 10 in biological duplicate. Error bars: +/- standard deviation (SD).  
 262 **B.** Plaque assays of HSV-1 WT and HSV-1  $\Delta$ UL56 in HaCaT, HFF hTERT, and Vero cells in biological  
 263 duplicate. Cells were subsequently immunostained for the viral glycoprotein gD. **C.** Plaque diameters from  
 264 (**B**) were measured and normalized to HSV-1 WT. Error bars: +/- SD, n = 35 to 67. **D.** Schematic of the  
 265 proteomics workflow. Cells were infected at MOI of 10 or mock infected. **E.** Scatter plot of all proteins  
 266 quantified, comparing HSV-1 WT and HSV-1  $\Delta$ UL56 at 8 hpi. Benjamini-Hochberg-corrected significance  
 267 B was used to estimate p-values (Cox and Mann, 2008). **F.** Temporal profiles of all proteins downregulated  
 268 >2-fold by HSV-1 WT vs mock and additionally rescued >2-fold by HSV-1  $\Delta$ UL56.

269 Identification of host proteins specifically depleted by pUL56

270 ICP0 and vhs are known to cause extensive remodelling of host protein expression  
271 to facilitate viral replication (Boutell and Everett, 2013; Smiley, 2004). Our data now  
272 suggest that pUL56 also contributes to host protein depletion but in a more targeted  
273 manner. To identify cellular proteins depleted by pUL56, HaCaT cells were infected with  
274 HSV-1 WT or  $\Delta$ UL56 and analyzed by TMT-based proteomics (Figure 5D, Table S4). Of  
275 the 7696 human proteins quantified, only a small number exhibited significant abundance  
276 changes between the WT and  $\Delta$ UL56 infections, and the largest change observed was  
277 for GOPC (Figure 5E-F). A small number of other potential targets of pUL56 were  
278 identified, defined by >2-fold reduced abundance in HSV-1 WT samples compared to  
279 mock and  $\Delta$ UL56 samples. These included Discs Large MAGUK Scaffold Protein 3  
280 (DLG3), Leucine Rich Repeat Containing 1 (LRRC1), and ErbB2 Interacting Protein  
281 (ERBIN), which may function as a complex: both LRRC1 (aka LANO) and ERBIN have  
282 been shown to interact with DLG proteins (Saito et al., 2001). The discs-large (DLG)  
283 family have a number of proposed functions including regulation of cell polarity and tight  
284 junction formation, and they are targeted for degradation by a number of viral families  
285 (Kong et al., 2014; Lee et al., 1997; Roberts et al., 2012). Remodelling cell polarity through  
286 pUL56-mediated degradation of these host proteins may facilitate HSV-1 spread *in vivo*.

287 Searching this TMT dataset against a 6-frame translation of KOS-strain HSV-1  
288 identified 14 novel HSV-1 proteins that increased in abundance over the course of  
289 infection, including 9 that were not identified in the initial QTV experiment (Figure S2B,  
290 Table S4).

291



## 292 pUL56-activity alters the plasma membrane proteome

293           Modulation of proteins at the cell surface is an immune evasion strategy utilized by  
294 multiple viruses. Since GOPC regulates the trafficking of certain proteins to the plasma  
295 membrane (Cheng et al., 2002), destruction of GOPC through the activity of pUL56 may  
296 be a mechanism to specifically modify the surface presentation of proteins in HSV-1  
297 infected cells. Plasma membrane profiling was thus performed on cells infected with HSV-  
298 1 WT or  $\Delta$ UL56 at 6 hpi using SILAC-based mass spectrometry (Figure 6, Table S5).  
299 Hierarchical clustering of the resulting data identified host proteins that are less abundant  
300 at the plasma membrane of HSV-1 WT infected cells and rescued by pUL56 deletion.  
301 These included immune signalling proteins TLR2 and IL18R1 as well as DUOX1 and  
302 several members of the solute carrier (SLC) family of proteins. TLR2 is a pattern  
303 recognition receptor that has a well-established activity against bacterial pathogen-  
304 associated molecular patterns (PAMPs), but also recognizes HSV-1 and HCMV  
305 glycoproteins (Boehme et al., 2006; Cai et al., 2013; Leoni et al., 2012). In response to  
306 herpesvirus infection, TLR2 plays a role in inducing interferon  $\gamma$  in neurons, cytokines in  
307 peritoneal macrophages, as well as controlling viral load in the CNS (Lima et al., 2010;  
308 Sorensen et al., 2008). IL18 is a proinflammatory cytokine that binds IL18R1, which is  
309 important for innate immune responses to HSV-2 infection *in vivo* (Harandi et al., 2001).  
310 Downregulating these immune receptors from the cell surface may be a pro-viral strategy  
311 to decrease inflammation and immune activation. DUOX1 (dual oxidase 1) is a  
312 transmembrane protein that can generate  $H_2O_2$  and functions in lactoperoxidase-  
313 mediated antimicrobial defence at mucosal surfaces (Sarr et al., 2018). Production of  
314  $H_2O_2$  has been shown to inhibit the splicing of influenza A virus (IAV) transcripts and

315 decrease production of infectious virus, and IAV has been shown to downregulate  
316 DUOX1 (Strengert et al., 2014). Removing DUOX1 from the plasma membrane may be  
317 similarly proviral for HSV-1 by inhibiting H<sub>2</sub>O<sub>2</sub> production. The mechanism by which HSV-  
318 1 depletes DUOX1 from the plasma membrane may be through pUL56-dependent  
319 degradation of DUOXA1 (Figure 5F) as DUOXA1 is a chaperone required for the  
320 maturation and transport of DUOX1 from the ER to the plasma membrane (Grasberger  
321 and Refetoff, 2006).

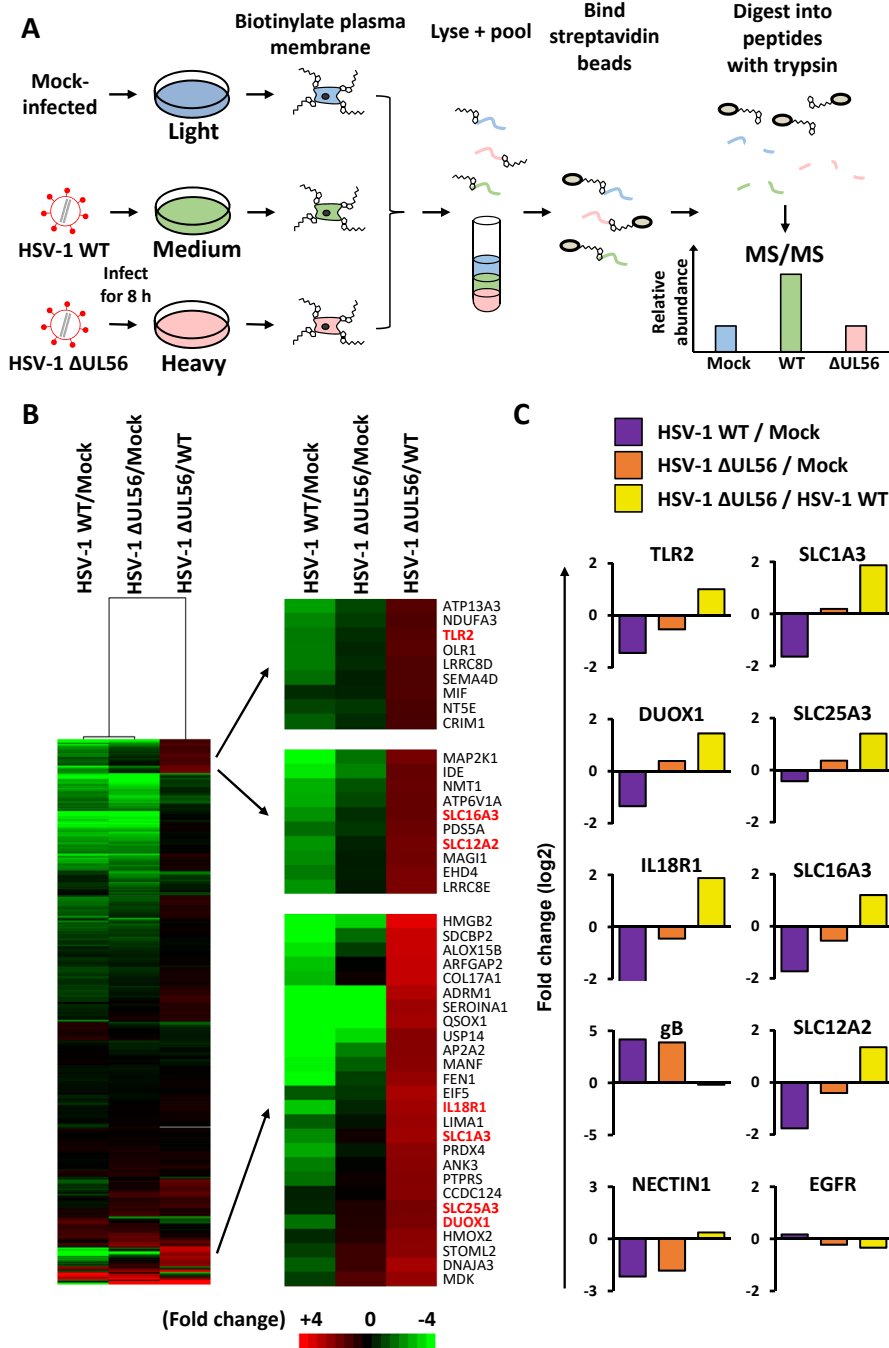

322

323 Figure 6: pUL56 modulates immune receptors through control of host trafficking to the plasma membrane  
 324 **A.** Schematic of the experimental workflow. SILAC labelled cells were infected at MOI of 10 or mock  
 325 infected. Samples were harvested 6 hpi and processed for plasma membrane enrichment and subsequent  
 326 quantitative mass spectrometry. **B.** Hierarchical cluster analysis of fold change values for each pairwise  
 327 comparison. Proteins were included if they are annotated as plasma membrane (PM), cell surface (CS), or  
 328 extracellular (XC) by Gene Ontology (GO), or with a short GO term as previously described (Weekes et al.,  
 329 2014). An enlargement of three subclusters is shown in the right panel, which included proteins  
 330 downregulated during infection with HSV-1 WT but rescued by infection with HSV-1  $\Delta$ UL56. **C.** Profiles of  
 331 example proteins that were downregulated >2-fold by HSV-1 WT and rescued >2-fold by HSV-1  $\Delta$ UL56 are  
 332 shown as well as controls.

333 TLR2 signalling is prevented by pUL56

334 To determine if loss of TLR2 from the cell surface was due to disruption of GOPC  
335 mediated trafficking, we generated GOPC knockout HaCaT cells using CRISPR/Cas9  
336 gene engineering. Three independent single-cell clones generated from two independent  
337 sgRNAs targeting GOPC were stained for surface TLR2 and analyzed by flow cytometry.  
338 Normal HaCaT cells included a TLR2<sup>+</sup> population, whereas all three GOPC knockout  
339 clones exhibited reduced cell surface TLR2 (Figure 7A-B), suggesting TLR2 surface  
340 expression is GOPC-dependent.

341 Human monocytes respond to HSV-1 infection via TLR2 (Ahmad et al., 2008). To  
342 assess the biological effect of TLR2 downregulation during infection, receptor activity was  
343 measured in the THP1 human monocytic cell line. Cells were infected with HSV-1 WT or  
344  $\Delta$ UL56 and then stimulated with the TLR2 agonist PAM<sub>3</sub>CSK<sub>4</sub>. The expression levels of  
345 TNF $\alpha$  mRNA, which is stimulated by TLR2 signalling, were analyzed by RT-PCR.  
346 PAM<sub>3</sub>CSK<sub>4</sub> treatment of mock infected cells stimulated TNF $\alpha$  expression as expected,  
347 and infection with HSV-1 WT suppressed TNF $\alpha$  levels to below unstimulated controls. Cells  
348 infected with HSV-1  $\Delta$ UL56 showed greater levels of TNF $\alpha$  expression relative to HSV-1  
349 WT, although the levels were still suppressed compared to mock infected cells stimulated  
350 with PAM<sub>3</sub>CSK<sub>4</sub> (Figure 7C). This suggests that the functional consequences of pUL56-  
351 stimulated degradation of GOPC includes inhibition of TLR2 signalling.

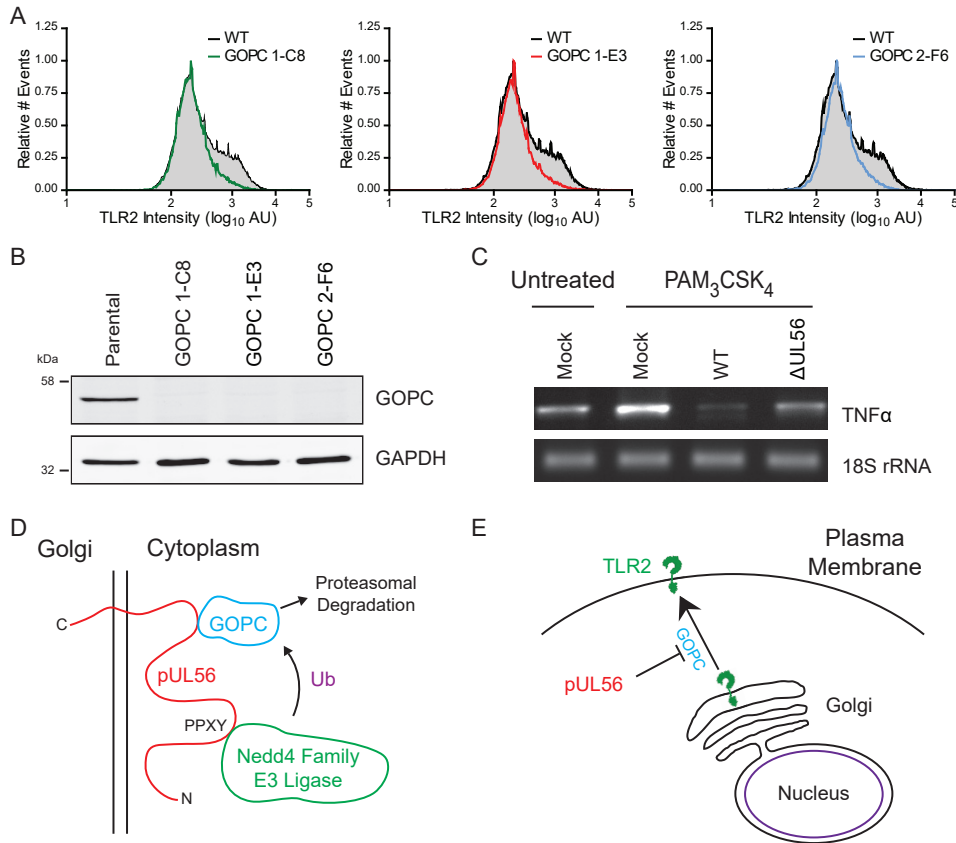

352

353 **Figure 7: pUL56 degrades GOPC to prevent presentation of TLR2 at the plasma membrane**

354 **A.** Flow cytometry analysis of TLR2 levels at the plasma membrane of HaCaT wild-type (WT) cells, and  
 355 three GOPC knockout (GOPC) clones. Single cell clones (C8, E3, and F6) were isolated from CRISPR  
 356 knockout cells made from 2 independent gRNAs (GOPC 1 and GOPC 2). **B.** Immunoblot analysis of GOPC  
 357 knockout cells. **C.** Differentiated THP1 cells were infected at MOI of 10 with the indicated virus and at 6 hpi  
 358 100 ng/mL PAM<sub>3</sub>CSK<sub>4</sub> was added. At 1 day post infection, RNA was extracted and analyzed for TNFα  
 359 mRNA relative to 18S rRNA. **D.** Model illustrating how pUL56 mediates the degradation of GOPC through  
 360 recruitment of host Nedd4 family E3 ubiquitin ligases via PPXY motifs. **E.** Degradation of GOPC results in  
 361 the loss of specific anti-viral proteins, such as TLR2, from the cell surface.  
 362

## 363 **Discussion**

364           In this study we combined three powerful unbiased proteomic analysis techniques,  
365 quantitative temporal viromics (Figures 1, 2 and 5), affinity enrichment (Figure 3) and  
366 plasma-membrane proteomics (Figure 6), to identify that HSV-1 protein pUL56 promotes  
367 degradation of the host-cell trafficking factor GOPC and in doing so lowers the abundance  
368 of important immune signalling molecules at the plasma membrane of infected cells.  
369 Biochemistry and cell biology experiments (Figures 3, 4, 5 and 7) confirmed that pUL56  
370 binds directly to GOPC, is both necessary and sufficient to promote GOPC degradation,  
371 requires the recruitment of the NEDD4 family of ubiquitin ligases via its PPXY motifs for  
372 such degradation, and results in changes in the cell-surface proteome through the loss of  
373 GOPC. The proteomic datasets presented in this manuscript represent a rich resource  
374 for identifying and characterizing the mechanisms by which herpesviruses modulate both  
375 the whole-cell and plasma-membrane proteomes of infected cells.

376

### 377 Temporal insights into HSV-1 infection

378           The QTV data presented herein represent the most comprehensive analysis of  
379 host-cell proteome changes upon HSV-1 infection to date, with almost 7000 host proteins  
380 quantified, and provide important insights into the kinetics of HSV-1 viral protein  
381 production. K-means analysis identified five distinct profiles of protein expression (Figure  
382 S1). Immediate early and early genes were found in the same class (Tp2). This  
383 presumably arises from the high multiplicity of infection, required for synchronous and  
384 complete infection, and the use of 2 hpi as the earliest time point. These conditions may  
385 have masked some of the differences in the kinetic profiles of immediate early and early

386 gene classes. Interestingly, late genes appeared to cluster into three distinct groups (Tp3-  
387 5). While late genes have previously been divided into late and true late classes,  
388 dependent on the requirement for prior genome replication (Kibler et al., 1991), our data  
389 suggests that an intermediate kinetic class may exist. Alternatively, this data may highlight  
390 that viral proteins can mature at different rates despite their expression being induced at  
391 the same time.

392 This kinetic analysis of HSV-1 protein abundance identified that ICP47 (US12) has  
393 a unique temporal profile (Tp1, Figure S1). Unlike all other viral proteins, where the  
394 abundance increases throughout infection, the amount of ICP47 peaks early during  
395 infection and the protein is subsequently downregulated. ICP47 binds and inhibits the  
396 MHC class I peptide loading complex Transporter of Antigenic Peptides (TAP), preventing  
397 peptide presentation at the cell surface and promoting immune evasion (Hill et al., 1995).  
398 The varying abundance of ICP47 during infection might therefore have the effect of  
399 balancing evasion of CD8+ T-cells whilst preventing activation of NK cell killing, by  
400 precisely regulating the level of MHC-I reduction at the cell surface.

401

#### 402 HSV-1 pUL56 degrades GOPC by recruiting cellular E3 ligases

403 HSV-1 strains lacking pUL56 are attenuated in animal models (Berkowitz et al.,  
404 1994; Kulej et al., 2017; Rosen-Wolff et al., 1991), despite the protein being dispensable  
405 for virus replication in cultured cells (Figure 5A-C) (Ushijima et al., 2008). Our data provide  
406 a molecular mechanism by which pUL56 may enhance virulence during infection, by  
407 promoting the degradation of GOPC and subsequent down-regulation of immune  
408 signalling molecules from the surface of infected cells.

409 Previous studies from HSV-1 and HSV-2 have shown pUL56 interact with ITCH  
410 and NEDD4, leading to their degradation, but the importance of this activity remained  
411 elusive (Ushijima et al., 2008; Ushijima et al., 2010). Our IP-MS data revealed that pUL56  
412 binds multiple cellular NEDD4-family ubiquitin ligases and the trafficking factor GOPC  
413 (Figure 3A). We show that pUL56 binds directly to the coiled-coil region of GOPC (Figure  
414 3B), is necessary for the proteasome-mediated degradation of GOPC in HSV-1 infected  
415 cells (Figure 4A-B), and is sufficient to promote GOPC degradation in the absence of  
416 infection (Figure 4C-D). Furthermore, we show that the NEDD4-binding PPXY motifs of  
417 pUL56 are required for GOPC degradation (Figure 4E). Taken together, these data  
418 strongly support a model whereby pUL56 binds simultaneously to GOPC and the NEDD4  
419 family of ubiquitin ligases in order to promote GOPC ubiquitination and proteasomal  
420 degradation (Figure 7D). pUL56 is itself protected from degradation as it does not contain  
421 lysine residues to which ubiquitin could be conjugated.

422 GOPC is rapidly degraded during HSV-1 WT infection (Figure 2D) and its  
423 abundance is restored during infection with HSV-1  $\Delta$ UL56 (Figure 5E). Several other  
424 proteins are also rescued when comparing HSV-1 WT to  $\Delta$ UL56 infection. This may  
425 reflect direct pUL56-mediated degradation or be an indirect consequence caused by the  
426 loss of GOPC.

427

#### 428 HSV-1 degrades a trafficking factor to modify the surface of infected cells

429 Many viruses modify the surface of infected cells in order to modulate the host  
430 immune response. For example, HIV-1 Vpu recruits an E3 ligase to promote the  
431 ubiquitination and the degradation of several cell-surface proteins (Matheson et al., 2015).



432 Alternatively, it has been shown that multiple proteins from human cytomegalovirus act  
433 via distinct mechanisms to restrict the cell-surface presentation of class I MHC and NK  
434 cell receptors (Wilkinson et al., 2008). Using global unbiased approaches, we have now  
435 identified that HSV-1 pUL56 modifies the surface abundance of cellular immune signalling  
436 proteins by specifically degrading a key cellular trafficking factor. This factor, GOPC, may  
437 be a common target for modulation by viruses: human papillomavirus type 16 E6 protein  
438 was shown to bind GOPC and mediate its degradation through the host E3 ubiquitin ligase  
439 E6AP (Jeong et al., 2007). Unlike pUL56, E6 binds to the PDZ domain of GOPC through  
440 a PDZ-binding motif. In addition, the classical swine fever virus NS2 protein bound GOPC  
441 in a yeast two-hybrid screen (Kang et al., 2012), although it has not yet been determined  
442 if GOPC is degraded during infection with this virus.

443         The pUL56 homologues from equine herpesvirus type 1 (EHV-1) and type 4 (EHV-  
444 4) share only 20% identity with HSV-1 pUL56, yet both are type II transmembrane proteins  
445 that possess multiple PPXY motifs and have few or no cytoplasmic lysine residues.  
446 Interestingly, both EHV-1 and EHV-4 have been shown to downregulate MHC-1 from the  
447 surface of infected cells in a pUL56-dependent fashion (Ma et al., 2012; Said et al., 2012).  
448 Similarly, U24 from human herpesvirus 6A (HHV-6A) is a tail-anchored (type-II)  
449 membrane protein containing a PPXY motif and has been shown to downregulate the T-  
450 cell receptor (Koshizuka et al., 2018; Sullivan and Coscoy, 2008). It therefore seems likely  
451 that EHV pUL56 and HHV-6A U24 also recruit NEDD4-family ubiquitin ligases to degrade  
452 specific cellular proteins and thus modify cell-surface protein abundance, but the direct  
453 targets of these proteins remain unknown.

454 In conclusion, our data have identified that HSV-1 pUL56 targets GOPC for  
455 proteasomal degradation, thereby removing immune signalling molecules from the  
456 plasma membrane. This represents an elegant and efficient mechanism by which HSV-1  
457 can remodel the surface of infected cells. The degradation of GOPC by other viruses such  
458 as human papillomavirus suggests that targeting of GOPC specifically, or trafficking  
459 factors more generally, may represent a common mechanism by which viruses modulate  
460 the host-cell surface to evade host immune surveillance.

461

## 462 **Acknowledgments**

463 We thank Kate Heesom (University of Bristol) for SILAC immunoprecipitation mass  
464 spectrometry sample processing and data acquisition. We thank Steve West (Frances  
465 Crick Institute) for the SETX antibody, Nick Gay and Atul Udgata (University of  
466 Cambridge) for THP1 cells, Susanna Colaco for superb technical assistance and Janet  
467 Deane for helpful discussions. This work was funded by a Wellcome Trust PhD  
468 studentships to J.M., C.S. and H.G.B., a Sir Henry Dale Fellowship, jointly funded by the  
469 Wellcome Trust and the Royal Society (098406/Z/12/B), to S.C.G., a Wellcome Trust  
470 Senior Clinical Research Fellowship (108070/Z/15/Z) to M.P.W. and a BBSRC Research  
471 Grant (BB/M021424/1) to C.M.C. This research was supported by the Cambridge NIHR  
472 BRC Cell Phenotyping Hub.

473

## 474 **Author Contributions**

475 Conceptualization, T.K.S., J.M., S.C.G., M.P.W., C.M.C.

476 Methodology, T.K.S., C.T.R.D., E.E., S.C.G., M.P.W., C.M.C.

477 Validation, T.K.S., C.T.R.D., J.M., C.R.B.

478 Investigation, T.K.S., C.T.R.D., J.M., V.C., C.R.B., H.G.B., C.S., E.E.  
479 Data Curation T.K.S., C.T.R.D., J.M., S.C.G., M.P.W., C.M.C.  
480 Writing – Original Draft, T.K.S., C.T.R.D., J.M.  
481 Writing – Review & Editing T.K.S., C.T.R.D., J.M., S.C.G., M.P.W., C.M.C.  
482 Visualization, T.K.S.; C.T.R.D., J.M., S.C.G., M.P.W., C.M.C.  
483 Supervision S.C.G., M.P.W., C.M.C.  
484 Project Administration C.M.C.  
485 Funding Acquisition S.C.G., M.P.W., C.M.C.

486

#### 487 **Declaration of Interests**

488 The authors declare no competing interests.

489

#### 490 **References**

491 Ahmad, R., El Bassam, S., Cordeiro, P., and Menezes, J. (2008). Requirement of TLR2-  
492 mediated signaling for the induction of IL-15 gene expression in human monocytic cells  
493 by HSV-1. *Blood* *112*, 2360-2368.

494 Berkowitz, C., Moyal, M., Rosen-Wolff, A., Darai, G., and Becker, Y. (1994). Herpes  
495 simplex virus type 1 (HSV-1) UL56 gene is involved in viral intraperitoneal pathogenicity  
496 to immunocompetent mice. *Arch Virol* *134*, 73-83.

497 Boehme, K.W., Guerrero, M., and Compton, T. (2006). Human cytomegalovirus envelope  
498 glycoproteins B and H are necessary for TLR2 activation in permissive cells. *J Immunol*  
499 *177*, 7094-7102.

500 Boukamp, P., Petrussevska, R.T., Breitkreutz, D., Hornung, J., Markham, A., and Fusenig,  
501 N.E. (1988). Normal keratinization in a spontaneously immortalized aneuploid human  
502 keratinocyte cell line. *J Cell Biol* 106, 761-771.

503 Boutell, C., Cuchet-Lourenco, D., Vanni, E., Orr, A., Glass, M., McFarlane, S., and Everett,  
504 R.D. (2011). A viral ubiquitin ligase has substrate preferential SUMO targeted ubiquitin  
505 ligase activity that counteracts intrinsic antiviral defence. *PLoS Pathog* 7, e1002245.

506 Boutell, C., and Everett, R.D. (2013). Regulation of alphaherpesvirus infections by the  
507 ICP0 family of proteins. *J Gen Virol* 94, 465-481.

508 Cai, M., Li, M., Wang, K., Wang, S., Lu, Q., Yan, J., Mossman, K.L., Lin, R., and Zheng,  
509 C. (2013). The herpes simplex virus 1-encoded envelope glycoprotein B activates NF-  
510 kappaB through the Toll-like receptor 2 and MyD88/TRAF6-dependent signaling pathway.  
511 *PLoS One* 8, e54586.

512 Caller, L.G., Davies, C.T.R., Antrobus, R., Lehner, P.J., Weekes, M.P., and Crump, C.M.  
513 (2019). Temporal Proteomic Analysis of BK Polyomavirus Infection Reveals Virus-  
514 Induced G2 Arrest and Highly Effective Evasion of Innate Immune Sensing. *J Virol* 93,  
515 e00595-19.

516 Chelbi-Alix, M.K., and de The, H. (1999). Herpes virus induced proteasome-dependent  
517 degradation of the nuclear bodies-associated PML and Sp100 proteins. *Oncogene* 18,  
518 935-941.

519 Cheng, J., Moyer, B.D., Milewski, M., Loffing, J., Ikeda, M., Mickle, J.E., Cutting, G.R., Li,  
520 M., Stanton, B.A., and Guggino, W.B. (2002). A Golgi-associated PDZ domain protein  
521 modulates cystic fibrosis transmembrane regulator plasma membrane expression. *J Biol*  
522 *Chem* 277, 3520-3529.

523 Conwell, S.E., White, A.E., Harper, J.W., and Knipe, D.M. (2015). Identification of TRIM27  
524 as a novel degradation target of herpes simplex virus 1 ICP0. *J Virol* 89, 220-229.

525 Cox, J., and Mann, M. (2008). MaxQuant enables high peptide identification rates,  
526 individualized p.p.b.-range mass accuracies and proteome-wide protein quantification.  
527 *Nat Biotechnol* 26, 1367-1372.

528 Cox, J., Neuhauser, N., Michalski, A., Scheltema, R.A., Olsen, J.V., and Mann, M. (2011).  
529 Andromeda: a peptide search engine integrated into the MaxQuant environment. *J*  
530 *Proteome Res* 10, 1794-1805.

531 Dephoure, N., and Gygi, S.P. (2011). A solid phase extraction-based platform for rapid  
532 phosphoproteomic analysis. *Methods* 54, 379-386.

533 Elias, J.E., and Gygi, S.P. (2010). Target-decoy search strategy for mass spectrometry-  
534 based proteomics. *Methods Mol Biol* 604, 55-71.

535 Ersing, I., Nobre, L., Wang, L.W., Soday, L., Ma, Y., Paulo, J.A., Narita, Y., Ashbaugh,  
536 C.W., Jiang, C., Grayson, N.E., *et al.* (2017). A Temporal Proteomic Map of Epstein-Barr  
537 Virus Lytic Replication in B Cells. *Cell Rep* 19, 1479-1493.

538 Gierasch, W.W., Zimmerman, D.L., Ward, S.L., Vanheyningen, T.K., Romine, J.D., and  
539 Leib, D.A. (2006). Construction and characterization of bacterial artificial chromosomes  
540 containing HSV-1 strains 17 and KOS. *J Virol Methods* 135, 197-206.

541 Gnann, J.W., Jr., and Whitley, R.J. (2017). Herpes Simplex Encephalitis: an Update. *Curr*  
542 *Infect Dis Rep* 19, 13.

543 Grasberger, H., and Refetoff, S. (2006). Identification of the maturation factor for dual  
544 oxidase. Evolution of an eukaryotic operon equivalent. *J Biol Chem* 281, 18269-18272.

545 Haas, W., Faherty, B.K., Gerber, S.A., Elias, J.E., Beausoleil, S.A., Bakalarski, C.E., Li,  
546 X., Villen, J., and Gygi, S.P. (2006). Optimization and use of peptide mass measurement  
547 accuracy in shotgun proteomics. *Mol Cell Proteomics* 5, 1326-1337.

548 Harandi, A.M., Svennerholm, B., Holmgren, J., and Eriksson, K. (2001). Interleukin-12  
549 (IL-12) and IL-18 are important in innate defense against genital herpes simplex virus  
550 type 2 infection in mice but are not required for the development of acquired gamma  
551 interferon-mediated protective immunity. *J Virol* 75, 6705-6709.

552 Hicks, S.W., and Machamer, C.E. (2005). Isoform-specific interaction of golgin-160 with  
553 the Golgi-associated protein PIST. *J Biol Chem* 280, 28944-28951.

554 Hill, A., Jugovic, P., York, I., Russ, G., Bennink, J., Yewdell, J., Ploegh, H., and Johnson,  
555 D. (1995). Herpes simplex virus turns off the TAP to evade host immunity. *Nature* 375,  
556 411-415.

557 Huang da, W., Sherman, B.T., and Lempicki, R.A. (2009). Systematic and integrative  
558 analysis of large gene lists using DAVID bioinformatics resources. *Nat Protoc* 4, 44-57.

559 Huttlin, E.L., Jedrychowski, M.P., Elias, J.E., Goswami, T., Rad, R., Beausoleil, S.A.,  
560 Villen, J., Haas, W., Sowa, M.E., and Gygi, S.P. (2010). A tissue-specific atlas of mouse  
561 protein phosphorylation and expression. *Cell* 143, 1174-1189.

562 Jeong, K.W., Kim, H.Z., Kim, S., Kim, Y.S., and Choe, J. (2007). Human papillomavirus  
563 type 16 E6 protein interacts with cystic fibrosis transmembrane regulator-associated  
564 ligand and promotes E6-associated protein-mediated ubiquitination and proteasomal  
565 degradation. *Oncogene* 26, 487-499.

566 Jiang, Z., Su, C., and Zheng, C. (2016). Herpes Simplex Virus 1 Tegument Protein UL41  
567 Counteracts IFIT3 Antiviral Innate Immunity. *J Virol* 90, 11056-11061.

568 Kall, L., Canterbury, J.D., Weston, J., Noble, W.S., and MacCoss, M.J. (2007). Semi-  
569 supervised learning for peptide identification from shotgun proteomics datasets. *Nat*  
570 *Methods* 4, 923-925.

571 Kang, K., Guo, K., Tang, Q., Zhang, Y., Wu, J., Li, W., and Lin, Z. (2012). Interactive  
572 cellular proteins related to classical swine fever virus non-structure protein 2 by yeast two-  
573 hybrid analysis. *Mol Biol Rep* 39, 10515-10524.

574 Kibler, P.K., Duncan, J., Keith, B.D., Hupel, T., and Smiley, J.R. (1991). Regulation of  
575 herpes simplex virus true late gene expression: sequences downstream from the US11  
576 TATA box inhibit expression from an unreplicated template. *J Virol* 65, 6749-6760.

577 Kim, W., Bennett, E.J., Huttlin, E.L., Guo, A., Li, J., Possemato, A., Sowa, M.E., Rad, R.,  
578 Rush, J., Comb, M.J., *et al.* (2011). Systematic and quantitative assessment of the  
579 ubiquitin-modified proteome. *Mol Cell* 44, 325-340.

580 Kong, K., Kumar, M., Taruishi, M., and Javier, R.T. (2014). The human adenovirus E4-  
581 ORF1 protein subverts discs large 1 to mediate membrane recruitment and dysregulation  
582 of phosphatidylinositol 3-kinase. *PLoS Pathog* 10, e1004102.

583 Koshizuka, T., Goshima, F., Takakuwa, H., Nozawa, N., Daikoku, T., Koiwai, O., and  
584 Nishiyama, Y. (2002). Identification and characterization of the UL56 gene product of  
585 herpes simplex virus type 2. *J Virol* 76, 6718-6728.

586 Koshizuka, T., Kobayashi, T., Ishioka, K., and Suzutani, T. (2018). Herpesviruses possess  
587 conserved proteins for interaction with Nedd4 family ubiquitin E3 ligases. *Sci Rep* 8, 4447.

588 Koujah, L., Suryawanshi, R.K., and Shukla, D. (2019). Pathological processes activated  
589 by herpes simplex virus-1 (HSV-1) infection in the cornea. *Cell Mol Life Sci* 76, 405-419.

590 Kulej, K., Avgousti, D.C., Sidoli, S., Herrmann, C., Della Fera, A.N., Kim, E.T., Garcia,  
591 B.A., and Weitzman, M.D. (2017). Time-resolved Global and Chromatin Proteomics  
592 during Herpes Simplex Virus Type 1 (HSV-1) Infection. *Mol Cell Proteomics* 16, S92-  
593 S107.

594 Lee, S.S., Weiss, R.S., and Javier, R.T. (1997). Binding of human virus oncoproteins to  
595 hDlg/SAP97, a mammalian homolog of the *Drosophila* discs large tumor suppressor  
596 protein. *Proc Natl Acad Sci U S A* 94, 6670-6675.

597 Lees-Miller, S.P., Long, M.C., Kilvert, M.A., Lam, V., Rice, S.A., and Spencer, C.A. (1996).  
598 Attenuation of DNA-dependent protein kinase activity and its catalytic subunit by the  
599 herpes simplex virus type 1 transactivator ICP0. *J Virol* 70, 7471-7477.

600 Leoni, V., Gianni, T., Salvioli, S., and Campadelli-Fiume, G. (2012). Herpes simplex virus  
601 glycoproteins gH/gL and gB bind Toll-like receptor 2, and soluble gH/gL is sufficient to  
602 activate NF-kappaB. *J Virol* 86, 6555-6562.

603 Lilley, C.E., Chaurushiya, M.S., Boutell, C., Everett, R.D., and Weitzman, M.D. (2011).  
604 The intrinsic antiviral defense to incoming HSV-1 genomes includes specific DNA repair  
605 proteins and is counteracted by the viral protein ICP0. *PLoS Pathog* 7, e1002084.

606 Lima, G.K., Zolini, G.P., Mansur, D.S., Freire Lima, B.H., Wischhoff, U., Astigarraga, R.G.,  
607 Dias, M.F., das Gracas Almeida Silva, M., Bela, S.R., do Valle Antonelli, L.R., *et al.* (2010).  
608 Toll-like receptor (TLR) 2 and TLR9 expressed in trigeminal ganglia are critical to viral  
609 control during herpes simplex virus 1 infection. *Am J Pathol* 177, 2433-2445.

610 Looker, K.J., Garnett, G.P., and Schmid, G.P. (2008). An estimate of the global prevalence  
611 and incidence of herpes simplex virus type 2 infection. *Bull World Health Organ* 86, 805-  
612 812, A.



613 Looker, K.J., Magaret, A.S., May, M.T., Turner, K.M., Vickerman, P., Gottlieb, S.L., and  
614 Newman, L.M. (2015). Global and Regional Estimates of Prevalent and Incident Herpes  
615 Simplex Virus Type 1 Infections in 2012. *PLoS One* 10, e0140765.

616 Ma, G., Feineis, S., Osterrieder, N., and Van de Walle, G.R. (2012). Identification and  
617 characterization of equine herpesvirus type 1 pUL56 and its role in virus-induced  
618 downregulation of major histocompatibility complex class I. *J Virol* 86, 3554-3563.

619 Makarov, A., and Denisov, E. (2009). Dynamics of ions of intact proteins in the Orbitrap  
620 mass analyzer. *J Am Soc Mass Spectrom* 20, 1486-1495.

621 Matheson, N.J., Sumner, J., Wals, K., Rapiteanu, R., Weekes, M.P., Vigan, R., Weinelt,  
622 J., Schindler, M., Antrobus, R., Costa, A.S., *et al.* (2015). Cell Surface Proteomic Map of  
623 HIV Infection Reveals Antagonism of Amino Acid Metabolism by Vpu and Nef. *Cell Host*  
624 *Microbe* 18, 409-423.

625 McAlister, G.C., Huttlin, E.L., Haas, W., Ting, L., Jedrychowski, M.P., Rogers, J.C., Kuhn,  
626 K., Pike, I., Grothe, R.A., Blethrow, J.D., *et al.* (2012). Increasing the multiplexing capacity  
627 of TMTs using reporter ion isotopologues with isobaric masses. *Anal Chem* 84, 7469-  
628 7478.

629 McAlister, G.C., Nusinow, D.P., Jedrychowski, M.P., Wuhr, M., Huttlin, E.L., Erickson,  
630 B.K., Rad, R., Haas, W., and Gygi, S.P. (2014). MultiNotch MS3 enables accurate,  
631 sensitive, and multiplexed detection of differential expression across cancer cell line  
632 proteomes. *Anal Chem* 86, 7150-7158.

633 McLean, C., Buckmaster, A., Hancock, D., Buchan, A., Fuller, A., and Minson, A. (1982).  
634 Monoclonal antibodies to three non-glycosylated antigens of herpes simplex virus type 2.  
635 *J Gen Virol* 63, 297-305.

636 McSharry, B.P., Jones, C.J., Skinner, J.W., Kipling, D., and Wilkinson, G.W. (2001).  
637 Human telomerase reverse transcriptase-immortalized MRC-5 and HCA2 human  
638 fibroblasts are fully permissive for human cytomegalovirus. *J Gen Virol* 82, 855-863.

639 Minson, A.C., Hodgman, T.C., Digard, P., Hancock, D.C., Bell, S.E., and Buckmaster, E.A.  
640 (1986). An analysis of the biological properties of monoclonal antibodies against  
641 glycoprotein D of herpes simplex virus and identification of amino acid substitutions that  
642 confer resistance to neutralization. *J Gen Virol* 67 ( Pt 6), 1001-1013.

643 Muenzner, J., Traub, L.M., Kelly, B.T., and Graham, S.C. (2017). Cellular and viral  
644 peptides bind multiple sites on the N-terminal domain of clathrin. *Traffic* 18, 44-57.

645 Orzalli, M.H., Conwell, S.E., Berrios, C., DeCaprio, J.A., and Knipe, D.M. (2013). Nuclear  
646 interferon-inducible protein 16 promotes silencing of herpesviral and transfected DNA.  
647 *Proc Natl Acad Sci U S A* 110, E4492-4501.

648 Orzalli, M.H., DeLuca, N.A., and Knipe, D.M. (2012). Nuclear IFI16 induction of IRF-3  
649 signaling during herpesviral infection and degradation of IFI16 by the viral ICP0 protein.  
650 *Proc Natl Acad Sci U S A* 109, E3008-3017.

651 Parkinson, J., Lees-Miller, S.P., and Everett, R.D. (1999). Herpes simplex virus type 1  
652 immediate-early protein vmw110 induces the proteasome-dependent degradation of the  
653 catalytic subunit of DNA-dependent protein kinase. *J Virol* 73, 650-657.

654 Pinninti, S.G., and Kimberlin, D.W. (2018). Neonatal herpes simplex virus infections.  
655 *Semin Perinatol* 42, 168-175.

656 Ran, F.A., Hsu, P.D., Wright, J., Agarwala, V., Scott, D.A., and Zhang, F. (2013). Genome  
657 engineering using the CRISPR-Cas9 system. *Nat Protoc* 8, 2281-2308.

658 Roberts, S., Delury, C., and Marsh, E. (2012). The PDZ protein discs-large (DLG): the  
659 'Jekyll and Hyde' of the epithelial polarity proteins. *FEBS J* 279, 3549-3558.

660 Rosen-Wolff, A., Lamade, W., Berkowitz, C., Becker, Y., and Darai, G. (1991). Elimination  
661 of UL56 gene by insertion of LacZ cassette between nucleotide position 116030 to 121753  
662 of the herpes simplex virus type 1 genome abrogates intraperitoneal pathogenicity in tree  
663 shrews and mice. *Virus Res* 20, 205-221.

664 Said, A., Azab, W., Damiani, A., and Osterrieder, N. (2012). Equine herpesvirus type 4  
665 UL56 and UL49.5 proteins downregulate cell surface major histocompatibility complex  
666 class I expression independently of each other. *J Virol* 86, 8059-8071.

667 Saito, H., Santoni, M.J., Arsanto, J.P., Jaulin-Bastard, F., Le Bivic, A., Marchetto, S.,  
668 Audebert, S., Isnardon, D., Adelaide, J., Birnbaum, D., *et al.* (2001). Lano, a novel LAP  
669 protein directly connected to MAGUK proteins in epithelial cells. *J Biol Chem* 276, 32051-  
670 32055.

671 Sarr, D., Toth, E., Gingerich, A., and Rada, B. (2018). Antimicrobial actions of dual  
672 oxidases and lactoperoxidase. *J Microbiol* 56, 373-386.

673 Schang, L.M., Phillips, J., and Schaffer, P.A. (1998). Requirement for cellular cyclin-  
674 dependent kinases in herpes simplex virus replication and transcription. *J Virol* 72, 5626-  
675 5637.

676 Sloan, E., Tatham, M.H., Gros Lambert, M., Glass, M., Orr, A., Hay, R.T., and Everett, R.D.  
677 (2015). Analysis of the SUMO2 Proteome during HSV-1 Infection. *PLoS Pathog* 11,  
678 e1005059.

679 Smiley, J.R. (2004). Herpes simplex virus virion host shutoff protein: immune evasion  
680 mediated by a viral RNase? *J Virol* 78, 1063-1068.

681 Smith, S., and Weller, S.K. (2015). HSV-I and the cellular DNA damage response. *Future*  
682 *Virology* 10, 383-397.

683 Soday, L., Lu, Y., Albarnaz, J.D., Davies, C.T.R., Antrobus, R., Smith, G.L., and Weekes,  
684 M.P. (2019). Quantitative Temporal Proteomic Analysis of Vaccinia Virus Infection  
685 Reveals Regulation of Histone Deacetylases by an Interferon Antagonist. *Cell Rep* 27,  
686 1920-1933 e1927.

687 Sorensen, L.N., Reinert, L.S., Malmgaard, L., Bartholdy, C., Thomsen, A.R., and Paludan,  
688 S.R. (2008). TLR2 and TLR9 synergistically control herpes simplex virus infection in the  
689 brain. *J Immunol* 181, 8604-8612.

690 Strelow, L.I., and Leib, D.A. (1995). Role of the virion host shutoff (vhs) of herpes simplex  
691 virus type 1 in latency and pathogenesis. *J Virol* 69, 6779-6786.

692 Strengert, M., Jennings, R., Davanture, S., Hayes, P., Gabriel, G., and Knaus, U.G.  
693 (2014). Mucosal reactive oxygen species are required for antiviral response: role of Duox  
694 in influenza a virus infection. *Antioxid Redox Signal* 20, 2695-2709.

695 Su, C., and Zheng, C. (2017). Herpes Simplex Virus 1 Abrogates the cGAS/STING-  
696 Mediated Cytosolic DNA-Sensing Pathway via Its Virion Host Shutoff Protein, UL41. *J*  
697 *Virology* 91, e02414-16.

698 Sullivan, B.M., and Coscoy, L. (2008). Downregulation of the T-cell receptor complex and  
699 impairment of T-cell activation by human herpesvirus 6 u24 protein. *J Virol* 82, 602-608.

700 Teo, H., Perisic, O., Gonzalez, B., and Williams, R.L. (2004). ESCRT-II, an endosome-  
701 associated complex required for protein sorting: crystal structure and interactions with  
702 ESCRT-III and membranes. *Dev Cell* 7, 559-569.

703 Ting, L., Rad, R., Gygi, S.P., and Haas, W. (2011). MS3 eliminates ratio distortion in  
704 isobaric multiplexed quantitative proteomics. *Nat Methods* 8, 937-940.

705 Tischer, B.K., Smith, G.A., and Osterrieder, N. (2010). En passant mutagenesis: a two  
706 step markerless red recombination system. *Methods Mol Biol* 634, 421-430.

707 Tyanova, S., Temu, T., Sinitcyn, P., Carlson, A., Hein, M.Y., Geiger, T., Mann, M., and Cox,  
708 J. (2016). The Perseus computational platform for comprehensive analysis of  
709 (prote)omics data. *Nat Methods* 13, 731-740.

710 Ushijima, Y., Koshizuka, T., Goshima, F., Kimura, H., and Nishiyama, Y. (2008). Herpes  
711 simplex virus type 2 UL56 interacts with the ubiquitin ligase Nedd4 and increases its  
712 ubiquitination. *J Virol* 82, 5220-5233.

713 Ushijima, Y., Luo, C., Kamakura, M., Goshima, F., Kimura, H., and Nishiyama, Y. (2010).  
714 Herpes simplex virus UL56 interacts with and regulates the Nedd4-family ubiquitin ligase  
715 Itch. *Virol J* 7, 179.

716 Weekes, M.P., Antrobus, R., Lill, J.R., Duncan, L.M., Hor, S., and Lehner, P.J. (2010).  
717 Comparative analysis of techniques to purify plasma membrane proteins. *J Biomol Tech*  
718 21, 108-115.

719 Weekes, M.P., Tomasec, P., Huttlin, E.L., Fielding, C.A., Nusinow, D., Stanton, R.J.,  
720 Wang, E.C., Aicheler, R., Murrell, I., Wilkinson, G.W., *et al.* (2014). Quantitative temporal  
721 viromics: an approach to investigate host-pathogen interaction. *Cell* 157, 1460-1472.

722 Wilkinson, G.W., Tomasec, P., Stanton, R.J., Armstrong, M., Prod'homme, V., Aicheler,  
723 R., McSharry, B.P., Rickards, C.R., Cochrane, D., Llewellyn-Lacey, S., *et al.* (2008).  
724 Modulation of natural killer cells by human cytomegalovirus. *J Clin Virol* 41, 206-212.

725 Wu, R., Dephoure, N., Haas, W., Huttlin, E.L., Zhai, B., Sowa, M.E., and Gygi, S.P. (2011).  
726 Correct interpretation of comprehensive phosphorylation dynamics requires  
727 normalization by protein expression changes. *Mol Cell Proteomics* 10, M111 009654.  
728 Yao, R., Maeda, T., Takada, S., and Noda, T. (2001). Identification of a PDZ domain  
729 containing Golgi protein, GOPC, as an interaction partner of frizzled. *Biochem Biophys*  
730 *Res Commun* 286, 771-778.  
731 Yuce, O., and West, S.C. (2013). Senataxin, defective in the neurodegenerative disorder  
732 ataxia with oculomotor apraxia 2, lies at the interface of transcription and the DNA damage  
733 response. *Mol Cell Biol* 33, 406-417.  
734 Zenner, H.L., Mauricio, R., Banting, G., and Crump, C.M. (2013). Herpes simplex virus 1  
735 counteracts tetherin restriction via its virion host shutoff activity. *J Virol* 87, 13115-13123.

736

### 737 **Supplementary Table Legends**

738 Table S1, related to Figure 1: Quantitative temporal analysis of HSV infection.

739 Interactive spreadsheet of the quantitative temporal viromics data from the HSV-1  
740 whole cell lysate time course. The “Data” worksheet shows minimally annotated protein  
741 data, with only formatting and normalization modifying the raw data. The “Plotter”  
742 worksheet enables generation of individual protein abundance changes from the time  
743 course. The ‘Viral classes’ tab shows the K-means clusters of all canonical HSV-1  
744 proteins, a list of 5 clusters are shown. The ‘MS Quantification’ tab shows the number of  
745 proteins and peptides quantified. The ‘Novel 6FT-ORFs’ tab contains details of putative  
746 new HSV-1 proteins that increased in abundance over the course of infection.

747

748 Table S2, related to Figure 2: Manipulation of cell host pathways during HSV infection.

749 DAVID functional enrichment analysis from proteins downregulated >2-fold against  
750 a background of all proteins quantified. Only significant (Benjamini-Hochberg corrected)  
751 clusters are shown. There were no significant clusters amongst proteins upregulated >2-  
752 fold.

753

754 Table S3, related to Figure 3: Identification of cellular interaction partners of pUL56.

755 Spreadsheet listing the SILAC ratios and statistical analysis of proteins quantified  
756 in pull-downs of pUL56 followed by mass spectrometry (IP-MS). Two different constructs  
757 of pUL56 encompassing either the full-length protein or its cytoplasmic domain were  
758 tested and the respective results are listed in separate tabs.

759

760 Table S4, related to Figure 5: Identification of pUL56 degradation targets.

761 Interactive spreadsheet displaying whole cell protein changes between cells  
762 infected with HSV-1 WT, HSV-1  $\Delta$ UL56 or mock. The “Data” worksheet shows minimally  
763 annotated protein data, with only formatting and normalization modifying the raw data.  
764 The “Plotter” worksheet enables generation of individual protein abundance changes,  
765 comparing the different viruses and time points. The ‘MS Quantification’ tab shows the  
766 number of proteins and peptides quantified. The ‘Novel 6FT-ORFs’ tab contains details  
767 of putative new HSV-1 proteins that increased in abundance over the course of infection.

768

769 Table S5, related to Figure 6: pUL56 modulates immune receptors through control of  
770 host trafficking to the plasma membrane.

771 Interactive spreadsheet of plasma membrane protein changes between cells  
772 infected with HSV-1 WT, HSV-1  $\Delta$ UL56 or mock. The “Data” worksheet shows minimally  
773 annotated protein data, with formatting and normalization modifying the raw data. GO  
774 terms were used to identify proteins associated with the plasma membrane, as described  
775 in the text. The “Plotter” worksheet enables generation of individual protein ratios between  
776 the three conditions. The ‘MS Quantification’ tab shows the number of proteins and  
777 peptides quantified.

778

## 779 **Methods**

### 780 Contact for Reagent and Resource Sharing

781 Further information and requests for resources and reagents should be directed to  
782 and will be fulfilled by the Lead Contact, Colin M. Crump ([cmc56@cam.ac.uk](mailto:cmc56@cam.ac.uk)).

783

### 784 *Mammalian cell culture*

785 HaCaT (Boukamp et al., 1988), telomerase immortalized human foreskin  
786 fibroblasts HFF hTERT (McSharry et al., 2001), Vero (ATCC), HEK293T (ATCC), and  
787 Flp-In™-293 (ThermoFisher) cells were maintained in Dulbecco's Modified Eagle's  
788 Medium (DMEM). THP1 cells were grown in RPMI 1640. All medium was supplemented  
789 with 10% fetal bovine serum (FBS), 2 mM L-glutamine, 100 U/mL penicillin, and 100  
790  $\mu$ g/mL streptomycin and cells were grown at 37°C in a humidified 5% CO<sub>2</sub> atmosphere.  
791 HFF hTERT, HaCaT, and THP1 cells are male; no gender is provided for the other cell



792 lines. For stable isotope labelling of amino acids in cell culture (SILAC) experiments, HEK  
793 293T cells were grown in SILAC medium (high glucose DMEM lacking arginine and  
794 lysine, Life Technologies) supplemented with 10% dialyzed fetal bovine serum (10 kDa  
795 cutoff), 2 mM glutamine, 100 U/mL penicillin and 100 µg/mL streptomycin. Media were  
796 supplemented with 84 mg/L arginine (light, unlabelled; medium, Arg6 (<sup>13</sup>C6); heavy,  
797 Arg10 (<sup>13</sup>C6, <sup>15</sup>N4)) and 146 mg/L lysine (light, unlabelled; medium, Lys4 (<sup>2</sup>H4); heavy,  
798 Lys8 (<sup>13</sup>C6, <sup>15</sup>N2)). Cells were maintained in SILAC media for at least five passages  
799 before use to ensure complete labelling.

800 THP1 cells (10<sup>6</sup> cells/mL) were differentiated by resuspension in RPMI 1640  
801 supplemented with in 16 nM phorbol 12-myristate-13-acetate (PMA) and seeded at  
802 2.5×10<sup>5</sup> cells/cm<sup>2</sup>. After treatment with PMA for 1 day, the media was changed to RPMI  
803 without PMA and the cells were given a recovery period of 2 days before being infected.

804

## 805 *Viruses*

806 All HSV-1 strain KOS viruses were reconstituted from a bacterial artificial  
807 chromosome (Gierasch et al., 2006). The deletion mutants were generated by inserting  
808 three tandem stop codons in frame using the two-step Red recombination method  
809 (Tischer et al., 2010). For ΔUL56 this is after residue 21, for ΔICP0 this is after residue  
810 11, and for Δvhs this is after residue 45 (Zenner et al., 2013). HSV-1 S17 and HSV-2 333  
811 were from S. Efstathiou (University of Cambridge), and HSV-1 SC16 was from A. Minson  
812 (University of Cambridge). Crude stocks were generated by infecting Vero cells at MOI of  
813 0.01. After 3 days, the cells were scraped and isolated by centrifugation at 900×g for 5  
814 min. They were resuspended in 1 mL of complete media per T150 used and

815 freeze/thawed thrice at  $-70^{\circ}\text{C}$  before being aliquoted, titred, and stored at  $-70^{\circ}\text{C}$  until  
816 required.

817

### 818 *Gradient purification of HSV-1*

819 HaCaT cells were seeded and infected with crude virus stocks at MOI of 0.1. After  
820 2 days, the cells were scraped and the cell debris was removed by centrifugation at  $900\times g$   
821 for 5 min. The supernatant was ultracentrifuged at  $24,000\times g$  for 1.5 h, and the pellet was  
822 resuspended in 1% FBS in PBS on ice overnight. This solution was overlaid on a 5-15%  
823 (w/v) continuous Ficoll in PBS gradient and ultracentrifuged at  $17,500\times g$  for 1.5 h. The  
824 virion band was isolated via side-puncture. This solution was diluted 10-fold in PBS, and  
825 the virus was pelleted by ultracentrifugation at  $49,000\times g$  for 2 h. The pellet was  
826 resuspended in PBS on ice overnight. This solution was aliquoted, titred, and stored at -  
827  $70^{\circ}\text{C}$  until required.

828

### 829 *Antibodies*

830 Primary antibodies used were: GOPC (Millipore, MABC731), DNA PKcs (Santa  
831 Cruz Biotechnology, sc-5282), IFI16 (Santa Cruz Biotechnology, sc-8023), SETX (OY7)  
832 (Yuce and West, 2013), , ITCH (Santa Cruz Biotechnology, sc-28367), WWP2 (Santa  
833 Cruz Biotechnology, sc-398090), GAPDH (ThermoFisher Scientific, AM4300), Actin  
834 (Abcam, AC-40), TLR2 (BioLegend, 153003), GFP (Clontech, JL-8), gD (LP2) (Minson et  
835 al., 1986), VP16 (LP1; Abcam, ab110226) (McLean et al., 1982), pUL56 (see below).  
836 Secondary antibodies used were: Alexa Fluor 488 labelled Donkey anti-Rabbit IgG  
837 (ThermoFisher Scientific, A21206), Alexa Fluor 568 labelled Donkey anti-Mouse IgG

838 (ThermoFisher Scientific, A10037), IRDye 680LT Goat anti-Mouse IgG (LiCor, 926-  
839 68020), IRDye 800CW Donkey anti-Rabbit IgG (LiCor, 926-32213), Goat anti-Mouse  
840 HRP conjugate (CiteAb, P0447).

841 An antibody against pUL56 was generated by commercial immunization of a rabbit  
842 using two peptides (peptide 1: NH<sub>2</sub>-CTSSGEGEASERGRSR-NH<sub>2</sub>; peptide 2: Ac-  
843 AARGSSDHAPYRRQGC-NH<sub>2</sub>) coupled to keyhole limpet hemocyanin (Eurogentec). An  
844 affinity purification column was generated by adding 0.96 mg of purified peptide 1  
845 dissolved in coupling buffer (250 mM Tris pH 8.5, 25 mM EDTA) to 0.4 mL of SulfoLink  
846 resin (ThermoFisher) equilibrated in the same buffer. The resin was incubated with the  
847 peptide for two hours at 20°C with regular mixing, washed with 1.2 mL of coupling buffer  
848 and then blocked using 50 mM cysteine in coupling buffer at 20°C for 90 minutes with  
849 regular mixing. The resin was subsequently washed twice with 1 mL of 1 M NaCl, followed  
850 by another two washes with 5 mL of PBS. The immune serum was mixed with an equal  
851 volume of PBS and incubated with the peptide-coupled resin for 20 h at 4°C. The affinity-  
852 purified antibody was eluted in fractions using 100 mM glycine pH 2.5 into tubes  
853 containing 10× neutralization buffer (1M Tris pH 8.5, 2 M NaCl). Specificity of the antibody  
854 for use in immunoblots was tested by probing against cell lysates where pUL56 was  
855 absent or overexpressed, against lysates of cells infected with HSV-1 WT or ΔUL56, and  
856 against the GST-tagged purified recombinant protein (see below). BSA was added to the  
857 antibody for stabilization (final concentration 1 mg/mL) and the antibody was stored as a  
858 50% (v/v) glycerol stock at -20°C.

859

860 *Infection*

861 Cell monolayers were infected with HSV-1 at the specified MOI diluted in complete  
862 media. For experiments to be analyzed by mass spectrometry, gradient-purified virus  
863 stocks were used. Otherwise, the infection was performed with crude virus stocks  
864 generated as described above. After adsorption for 1 h at 37°C with 5% CO<sub>2</sub> and rocking  
865 every 15 min, the appropriate media was added to the well and this was designated 0 hpi.  
866 Infected cells were incubated at 37°C in a humidified 5% CO<sub>2</sub> atmosphere until harvest.

867

868 *Whole cell lysate preparation and protein digestion for quantitative temporal viromics*

869 HaCaT cells were seeded into 6-well plates and infected in parallel at the specified  
870 MOI with gradient purified virus. At each indicated time point, cells were washed twice  
871 with PBS, and 250 µL lysis buffer was added (6M guanidine, 50 mM HEPES pH 8.5). Cell  
872 lifters (Corning) were used to scrape cells in lysis buffer, which was removed to an  
873 microcentrifuge tube, vortexed extensively, and then sonicated, and snap frozen in liquid  
874 nitrogen. After harvest, samples were stored at -70°C until all time points were harvested.  
875 Samples were thawed and cell debris was removed by centrifuging at 21,000×g for 10  
876 min twice. Dithiothreitol (DTT) was added to a final concentration of 5 mM and samples  
877 were incubated for 20 min. Cysteines were alkylated with 14 mM iodoacetamide and  
878 incubated 20 min at room temperature in the dark. Excess iodoacetamide was quenched  
879 with DTT for 15 mins. Samples were diluted with 200 mM HEPES pH 8.5 to 1.5 M  
880 guanidine, followed by digestion at room temperature for 3 h with LysC protease (Wako)  
881 at a 1:100 protease-to-protein ratio. Samples were further diluted with 200 mM HEPES  
882 pH 8.5 to 0.5 M guanidine. Trypsin (Pierce) was then added at a 1:100 protease-to-protein

883 ratio followed by overnight incubation at 37°C. The reaction was quenched with 5% (v/v)  
884 formic acid (FA), then centrifuged at 21,000×g for 10 min to remove undigested protein.  
885 Peptides were subjected to C18 solid-phase extraction (SPE; Sep-Pak, Waters) and  
886 vacuum-centrifuged to near-dryness.

887

#### 888 *Peptide labelling with tandem mass tags for whole cell experiments*

889 In preparation for TMT labelling, desalted peptides were dissolved in 200 mM  
890 HEPES pH 8.5. Peptide concentration was measured by microBCA (Pierce), and >25 µg  
891 of peptide were labelled with TMT reagent. TMT reagents (0.8 mg) were dissolved in 43  
892 µL anhydrous acetonitrile (MeCN) and 5 µL was added to the peptides at a final MeCN  
893 concentration of 30% (v/v). Sample labelling was as indicated in Table S1 and S4.  
894 Following incubation at room temperature for 1 h, the reaction was quenched with  
895 hydroxylamine to a final concentration of 0.5%. TMT-labelled samples were combined at  
896 a 1:1:1:1:1:1:1:1:1 ratio. The sample was vacuum-centrifuged to near dryness and  
897 subjected to C18 SPE (Sep-Pak, Waters). An unfractionated sample was analyzed  
898 initially to ensure similar peptide loading across each TMT channel, to avoid the need for  
899 excessive (>2-fold) electronic normalization. Samples were combined according to the  
900 correction factors from the unfractionated analysis and subjected to C18 SPE (Sep-Pak,  
901 Waters) and vacuum-centrifuged to near-dryness. The dried pellet was resuspended in  
902 200 mM ammonium formate pH 10 and subjected to high pH reversed-phase (HpRP)  
903 fractionation is as described below.

904

905 *Offline HpRP fractionation for whole cell lysate experiments*

906 TMT-labelled tryptic peptides were subjected to HpRP fractionation using an  
907 Ultimate 3000 RSLC UHPLC system (Thermo Fisher Scientific) equipped with a 2.1 mm  
908 internal diameter (ID) x 25 cm long, 1.7  $\mu$ m particle Kinetix Evo C18 column  
909 (Phenomenex). Mobile phase consisted of A: 3% (v/v) MeCN, B: MeCN and C: 200 mM  
910 ammonium formate pH 10. Isocratic conditions were 90% A / 10% C, and C was  
911 maintained at 10% throughout the gradient elution. Separations were conducted at 45°C.  
912 Samples were loaded at 200  $\mu$ L/min for 5 min. The flow rate was then increased to 400  
913  $\mu$ L/min over 5 min, after which the gradient elution proceed as follows: 0-19% B over 10  
914 min, 19-34% B over 14.25 min, 34-50% B over 8.75 min, followed by a 10 min wash at  
915 90% B. UV absorbance was monitored at 280 nm and 15 s fractions were collected into  
916 96-well microplates using the integrated fraction collector. Fractions were recombined  
917 orthogonally in a checkerboard fashion, combining alternate wells from each column of  
918 the plate into a single fraction, and commencing combination of adjacent fractions in  
919 alternating rows. Wells prior to the start or after the stop of elution of peptide-rich fractions,  
920 as identified from the UV trace, were excluded. This yielded two sets of 12 combined  
921 fractions, A and B, which were dried in a vacuum centrifuge and resuspended in 10  $\mu$ L  
922 MS solvent (4% (v/v) MeCN / 5% (v/v) FA) prior to LC-MS3. For the time course  
923 experiment (Figure 1A) and  $\Delta$ UL56/wildtype HSV-1 whole cell lysate experiment (Figure  
924 5D), 12 set 'A' fractions were used for MS analysis.

925

926 *Offline Tip-Based Strong Cation Exchange SCX Fractionation*

927 Our previously described protocol for solid-phase extraction-based SCX peptide  
928 fractionation was modified for small peptide amounts (Dephoure and Gygi, 2011). Briefly,  
929 10 mg of PolySulfethyl A bulk material (Nest Group Inc.) was loaded on to a fritted 200  
930  $\mu$ L tip in 100% Methanol using a vacuum manifold. SCX material was conditioned slowly  
931 with 1 mL SCX buffer A (7M  $\text{KH}_2\text{PO}_4$ , pH 2.65, 30% (v/v) MeCN), then 0.5 mL SCX buffer  
932 B (7 mM  $\text{KH}_2\text{PO}_4$ , pH 2.65, 350 mM KCl, 30% (v/v) MeCN) then 2 mL SCX buffer A. Dried  
933 peptides were resuspended in 500  $\mu$ L SCX buffer A and added to the tip at a flow rate of  
934  $\sim$ 150 mL/min, followed by a 150 mL wash with SCX buffer A. Fractions were eluted in  
935 150  $\mu$ L buffer at increasing  $\text{K}^+$  concentrations (10, 25, 40, 60, 90, 150 mM KCl), vacuum-  
936 centrifuged to near dryness, then desalted using StageTips and vacuum-centrifuged to  
937 complete dryness and resuspended in 10  $\mu$ L MS solvent (4% (v/v) MeCN / 5% (v/v) FA)  
938 prior to LC-MS3.

939

940 *LC-MS/MS/MS for whole cell lysate experiments*

941 Mass spectrometry data was acquired using an Orbitrap Lumos (Thermo Fisher  
942 Scientific, San Jose, CA). An Ultimate 3000 RSLC nano UHPLC equipped with a 300  $\mu$ m  
943 ID x 5 mm Acclaim PepMap  $\mu$ -Precolumn (Thermo Fisher Scientific) and a 75  $\mu$ m ID x 50  
944 cm 2.1  $\mu$ m particle Acclaim PepMap RSLC analytical column was used. Loading solvent  
945 was 0.1% FA, analytical solvent A: 0.1% FA and B: 80% (v/v) MeCN + 0.1% FA. All  
946 separations were carried out at 55°C. Samples were loaded at 5  $\mu$ L/min for 5 min in  
947 loading solvent before beginning the analytical gradient. The following gradient was used:  
948 3-7% B over 3 min, 7-37% B over 173 min, followed by a 4-min wash at 95% B and

949 equilibration at 3% B for 15 min. Each analysis used a MultiNotch MS3-based TMT  
950 method (McAlister et al., 2012; McAlister et al., 2014). The following settings were used:  
951 MS1: 380-1500 Th, 120,000 Resolution,  $2 \times 10^5$  automatic gain control (AGC) target, 50  
952 ms maximum injection time. MS2: Quadrupole isolation at an isolation width of  $m/z$  0.7,  
953 CID fragmentation (normalized collision energy (NCE) 35) with ion trap scanning in turbo  
954 mode from  $m/z$  120,  $1.5 \times 10^4$  AGC target, 120 ms maximum injection time. MS3: In  
955 Synchronous Precursor Selection mode the top 6 MS2 ions were selected for HCD  
956 fragmentation (NCE 65) and scanned in the Orbitrap at 60,000 resolution with an AGC  
957 target of  $1 \times 10^5$  and a maximum accumulation time of 150 ms. Ions were not accumulated  
958 for all parallelizable time. The entire MS/MS/MS cycle had a target time of 3 s. Dynamic  
959 exclusion was set to  $\pm 10$  ppm for 70 s. MS2 fragmentation was triggered on precursors  
960  $5 \times 10^3$  counts and above.

961

#### 962 *TMT Data analysis*

963 In the following description, we list the first report in the literature for each relevant  
964 algorithm. Mass spectra were processed using a Sequest-based software pipeline for  
965 quantitative proteomics, “MassPike”, through a collaborative arrangement with Professor  
966 Steve Gygi’s laboratory at Harvard Medical School. MS spectra were converted to mxml  
967 using an extractor built upon Thermo Fisher’s RAW File Reader library (version 4.0.26).  
968 In this extractor, the standard mxml format has been augmented with additional custom  
969 fields that are specific to ion trap and Orbitrap mass spectrometry and essential for TMT  
970 quantitation. These additional fields include ion injection times for each scan, Fourier  
971 Transform-derived baseline and noise values calculated for every Orbitrap scan, isolation



972 widths for each scan type, scan event numbers, and elapsed scan times. This software  
973 is a component of the MassPike software platform and is licensed by Harvard Medical  
974 School.

975         A combined database was constructed from (a) the human UniProt database (26th  
976 January, 2017), (b) HSV-1 strain KOS (Genbank entry JQ673480.1, manually updated  
977 with a single amino acid polymorphism in the ICP4 sequence identified in the KOS BAC  
978 strain used for virus generation), (c) common contaminants such as porcine trypsin and  
979 endoprotease LysC. The combined database was concatenated with a reverse  
980 database composed of all protein sequences in reversed order. Searches were performed  
981 using a 20 ppm precursor ion tolerance (Haas et al., 2006). Product ion tolerance was set  
982 to 0.03 Th. TMT tags on lysine residues and peptide N termini (229.162932 Da) and  
983 carbamidomethylation of cysteine residues (57.02146 Da) were set as static  
984 modifications, while oxidation of methionine residues (15.99492 Da) was set as a variable  
985 modification.

986         To control the fraction of erroneous protein identifications, a target-decoy strategy  
987 was employed (Elias and Gygi, 2010). Peptide spectral matches (PSMs) were filtered to  
988 an initial peptide-level false discovery rate (FDR) of 1% with subsequent filtering to attain  
989 a final protein-level FDR of 1% (Kim et al., 2011; Wu et al., 2011). PSM filtering was  
990 performed using a linear discriminant analysis (Huttlin et al., 2010). This distinguishes  
991 correct from incorrect peptide IDs in a manner analogous to the widely used Percolator  
992 algorithm (Kall et al., 2007), though employing a distinct machine learning algorithm. The  
993 following parameters were considered: XCorr,  $\Delta C_n$ , missed cleavages, peptide length,  
994 charge state, and precursor mass accuracy. Protein assembly was guided by principles

995 of parsimony to produce the smallest set of proteins necessary to account for all observed  
996 peptides (Huttlin et al., 2010). Where all PSMs from a given HSV-1 protein could be  
997 explained either by a canonical gene or non-canonical ORF, the canonical gene was  
998 picked in preference.

999 In three cases, PSMs assigned to a non-canonical ORFs or novel 6FT-ORFs were  
1000 a mixture of peptides from the canonical protein and the ORF. This most commonly  
1001 occurred where the ORF was a 5'-terminal extension of the canonical protein (thus  
1002 meaning that the smallest set of proteins necessary to account for all observed peptides  
1003 included the ORFs alone). In these cases, the peptides corresponding to the canonical  
1004 protein were separated from those unique to the ORF, generating two separate entries.

1005 Proteins were quantified by summing TMT reporter ion counts across all matching  
1006 peptide-spectral matches using "MassPike", as described (McAlister et al., 2012;  
1007 McAlister et al., 2014). Briefly, a 0.003 Th window around the theoretical m/z of each  
1008 reporter ion (126, 127n, 127c, 128n, 128c, 129n, 129c, 130n, 130c, 131n, 131c) was  
1009 scanned for ions, and the maximum intensity nearest to the theoretical m/z was used.  
1010 The primary determinant of quantitation quality is the number of TMT reporter ions  
1011 detected in each MS3 spectrum, which is directly proportional to the signal-to-noise (S:N)  
1012 ratio observed for each ion (Makarov and Denisov, 2009). Conservatively, every  
1013 individual peptide used for quantitation was required to contribute sufficient TMT reporter  
1014 ions (minimum of ~1250 per spectrum) so that each on its own could be expected to  
1015 provide a representative picture of relative protein abundance (McAlister et al., 2012).  
1016 Additionally, an isolation specificity filter was employed to minimize peptide co-isolation  
1017 (Ting et al., 2011). Peptide-spectral matches with poor quality MS3 spectra (more than 9

1018 TMT channels missing and/or a combined S:N ratio of less than 250 across all TMT  
1019 reporter ions) or no MS3 spectra at all were excluded from quantitation. Peptides meeting  
1020 the stated criteria for reliable quantitation were then summed by parent protein, in effect  
1021 weighting the contributions of individual peptides to the total protein signal based on their  
1022 individual TMT reporter ion yields. Protein quantitation values were exported for further  
1023 analysis in Excel (Microsoft).

1024 For protein quantitation, reverse and contaminant proteins were removed, then  
1025 each reporter ion channel was summed across all quantified proteins and normalized  
1026 assuming equal protein loading across all channels. For further analysis and display in  
1027 figures, fractional TMT signals were used (i.e. reporting the fraction of maximal signal  
1028 observed for each protein in each TMT channel, rather than the absolute normalized  
1029 signal intensity). This effectively corrected for differences in the numbers of peptides  
1030 observed per protein. For TMT experiments, normalized S:N values are presented in  
1031 Table S1 and S4 ('Data' worksheet).

1032 Significance B was used to estimate the probability that each ratio was significantly  
1033 different to 1 (Cox and Mann, 2008). Values were calculated and corrected for multiple  
1034 hypothesis testing using the method of Benjamini-Hochberg in Perseus version 1.5.1.6  
1035 (Cox and Mann, 2008). A corrected p-value <0.05 was considered statistically significant.  
1036 Hierarchical centroid clustering based on uncentered Pearson correlation of data  
1037 normalized by comparing the signal:noise values to the average mock-infection were  
1038 performed using Cluster 3.0 (Stanford University) and visualised using Java Treeview  
1039 (<http://jtreeview.sourceforge.net>). For analysis of temporal classes, viral protein

1040 expression was normalised and subjected to K-means analysis using XLSTAT base  
1041 (Addinsoft, version 18.06) and clustered with 1-15 classes.

1042

#### 1043 *Immunoblot of cell lysates*

1044 Cells were seeded into 24-well plates and infected with crude virus stocks in  
1045 complete media or treated with 1 µg/mL doxycycline in complete media. Cells were  
1046 harvested at the specified time point by scraping into the media and centrifuging at  
1047 16,000×g for 1 min. The cell pellet was resuspended in SDS loading buffer (50 mM Tris  
1048 pH 6.8, 100 mM β-mercaptoethanol, 2% SDS, 10% glycerol). Samples were immediately  
1049 boiled in a water bath for 5 min. Lysate from 1×10<sup>5</sup> cells was used for sodium dodecyl  
1050 sulfate-polyacrylamide gel electrophoresis (SDS-PAGE). Proteins were wet transferred  
1051 onto 0.45 µm nitrocellulose membrane. After incubation with a primary antibody,  
1052 secondary antibodies conjugated to an IRDye were used, and blots were visualized with  
1053 an Odyssey CLx Imaging System (LiCor) using control software Image Studio v5.2.

1054

#### 1055 *Pathway analysis*

1056 The Database for Annotation, Visualisation and Integrated Discovery (DAVID)  
1057 version 6.8 was used to determine pathway enrichment (Huang da et al., 2009). Proteins  
1058 downregulated >2-fold were searched against a background of all proteins quantified,  
1059 using default settings.

1060

1061 *Immunoprecipitation*

1062           Monolayers of HEK 293T cells grown in 9 cm dishes ( $5 \times 10^6$  cells/dish) were  
1063 transfected using lipofectamine 2000 (Invitrogen) with GFP fusion proteins or GFP alone.  
1064 For experiments with SILAC-labelled cells, the relevant labelled medium was used to  
1065 prepare the transfection reagent. Cells were harvested 16-24 h post-transfection by  
1066 scraping into the medium, pelleted ( $220 \times g$ , 5 min,  $4^\circ C$ ) and washed three times with cold  
1067 PBS. Cells were then lysed at  $4^\circ C$  in 1 mL lysis buffer (10 mM Tris pH 7.5, 150 mM NaCl,  
1068 2 mM  $MgCl_2$ , 0.5% Triton X-100, 1:100 Sigma protease inhibitors, 50 U/mL Sigma  
1069 benzonase) for 45-90 min. The cell lysate was clarified by centrifugation ( $20,000 \times g$ , 10  
1070 min,  $4^\circ C$ ), the supernatant transferred to fresh tubes, a BCA assay (Pierce) was  
1071 performed to measure total protein concentration of clarified cell lysates, and samples  
1072 were normalized (*input*).

1073           GFP-Trap A beads (ChromoTek, 20  $\mu L$  per sample) were washed three times by  
1074 dilution in 800  $\mu L$  wash buffer (10 mM Tris pH 7.5, 150 mM NaCl, 2 mM  $MgCl_2$ , 0.05%  
1075 Triton X-100), centrifugation ( $2500 \times g$ , 2 min,  $4^\circ C$ ) to collect the beads and removal of the  
1076 supernatant. Washed beads were incubated with the cleared lysate at  $4^\circ C$  on a rotating  
1077 wheel for 45-70 min. The beads were collected by centrifugation and the supernatant  
1078 (*unbound*) was removed. The beads were washed twice with 1 mL wash buffer, the  
1079 supernatant was discarded, 45  $\mu L$  of 2 $\times$ SDS-PAGE loading buffer was added per  
1080 experiment and the was mixture boiled at  $95^\circ C$  for 10 min to elute bound proteins.  
1081 Samples were centrifuged again to sediment the beads ( $20,000 \times g$ , 2 min) and the  
1082 supernatant (*bound*) was transferred to a fresh tube. Input, unbound and bound samples  
1083 were separated by SDS-PAGE and analyzed by immunoblot. For mass spectroscopy

1084 analysis of SILAC samples, 8  $\mu$ L of light-, medium- and heavy-labelled bound samples  
1085 were mixed in a 1:1:1 ratio and frozen at  $-80^{\circ}\text{C}$  until mass spectroscopy analysis.

1086

#### 1087 *Mass spectrometry of SILAC IP samples*

1088 Mass spectrometry analysis was performed by the proteomics facility of the  
1089 University of Bristol (UK). Three biological repeats of each triple-labelled SILAC IP  
1090 experiment were analyzed. Samples were run into precast SDS-PAGE gels for 5 minutes,  
1091 the entire sample extracted from the gel as a single band, and then in-gel digested,  
1092 reduced and alkylated using a ProGest automated digestion unit (Digilab). The resulting  
1093 peptides were fractionated using an Ultimate 3000 nano-LC system in line with an  
1094 Orbitrap Fusion Tribrid mass spectrometer (Thermo Scientific). In brief, peptides in 1%  
1095 (v/v) FA were injected onto an Acclaim PepMap C18 nano-trap column (Thermo  
1096 Scientific). After washing with 0.5% MeCN in 0.1% FA, peptides were resolved on a 250  
1097 mm  $\times$  75  $\mu$ m Acclaim PepMap C18 reverse phase analytical column (Thermo Scientific)  
1098 over a 150 min organic gradient using 7 gradient segments (1-6% solvent B over 1 min,  
1099 6-15% B over 58 min, 15-32% B over 58 min, 32-40% B over 5 min, 40-90% B over 1  
1100 min, held at 90% B for 6 min and then reduced to 1% B over 1min) with a flow rate of 300  
1101 nL per minute. Solvent A was 0.1% FA and solvent B was aqueous 80% MeCN in 0.1%  
1102 FA. Peptides were ionized by nano-electrospray ionization at 2.0 kV using a stainless  
1103 steel emitter with an internal diameter of 30  $\mu$ m (Thermo Scientific) and a capillary  
1104 temperature of  $275^{\circ}\text{C}$ . All spectra were acquired using an Orbitrap Fusion Tribrid mass  
1105 spectrometer controlled by Xcalibur 2.1 software (Thermo Scientific) and operated in  
1106 data-dependent acquisition mode. FTMS1 spectra were collected at a resolution of

1107 120,000 over a scan range (m/z) of 350-1550, with an automatic gain control (AGC) target  
1108 of 300,000 and a max injection time of 100 ms. Precursors were filtered using an Intensity  
1109 Range of  $1 \times 10^4$  to  $1 \times 10^{20}$  and according to charge state (to include charge states 2-6)  
1110 and with monoisotopic precursor selection. Previously interrogated precursors were  
1111 excluded using a dynamic window (40 s +/-10 ppm). The MS2 precursors were isolated  
1112 with a quadrupole mass filter set to a width of 1.4 m/z. ITMS2 spectra were collected with  
1113 an AGC target of 20,000, max injection time of 40 ms and CID collision energy of 35%.

1114 The raw data files were processed using MaxQuant v. 1.5.7.4 (Cox and Mann,  
1115 2008). The in-built Andromeda search engine (Cox et al., 2011) was used to search  
1116 against the human and HSV-1 strain KOS proteomes as used for TMT analysis (above).  
1117 Trypsin/P digestion, standard modifications (oxidation, N-terminal acetylation) were  
1118 selected as group-specific parameters and SILAC quantification was performed using  
1119 light (Arg0, Lys0), medium (Arg6, Lys4) and heavy (Arg10, Lys8) labels. Re-  
1120 quantification, razor protein FDR, and second peptide options were enabled for the  
1121 processing. The quantified data were analyzed with Perseus v. 1.6.1.2 (Tyanova et al.,  
1122 2016) using the normalized ratios obtained by MaxQuant. Proteins only identified by site  
1123 or against the reverse database, as well as common experimental contaminants such as  
1124 keratins (specified in the MaxQuant contaminants file), were removed and the  
1125 experiments grouped by biological repeat. Only proteins identified in at least two of the  
1126 three biological repeats were considered for analysis. A one-sample, two-sided t-test with  
1127 a threshold p-value of 0.05 was performed on each group to identify significantly enriched  
1128 proteins. Proteins with a  $\log_2$  fold change greater than 1 and a p value smaller than 0.05  
1129 were designated as potential interactors of pUL56.

1130

1131 *Recombinant protein expression and purification*

1132 For bacterial recombinant expression, the cytoplasmic region (residues 1-207) of  
1133 UL56 from HSV-1 strain KOS was cloned into a vector derived from pOPT (Teo et al.,  
1134 2004) encoding *Schistosoma japonicum* GST followed by a human rhinovirus 3C  
1135 cleavage sequence fused to the N terminus and LysHis<sub>6</sub> fused to the C terminus (GST-  
1136 UL56(1-207)-His). Full-length (residues 1-454) and truncated forms (residues 1-362, 27-  
1137 362, 27-275, 276-362 and 27-236) of GOPC (UniProt ID Q9HD26-2) were cloned from  
1138 HeLa cell cDNA into a vector derived from pOPT (Teo et al., 2004) encoding a MetAlaHis<sub>6</sub>  
1139 tag fused to the N terminus of each construct (His-GOPC).

1140 His-GOPC (both full-length and truncations) was expressed in *Escherichia coli*  
1141 BL21(DE3)pLysS cells (Novagen) and GST-UL56(1–207)-His was expressed in *E. coli*  
1142 T7 Express LysY/lq cells (New England Biolabs). Cells were cultured in 2×TY medium to  
1143 an OD<sub>600</sub> between 0.8 and 1.0. For His-GOPC, the culture was cooled to 22°C before  
1144 adding 0.2 mM IPTG and culturing for a further 16 h. For GST-UL56(1–207)-His, 1 mM  
1145 IPTG was added and the cells were cultured for a further 2 h. Cells were harvested by  
1146 centrifugation and pellets stored at -80°C.

1147 For His-GOPC, cell pellets were resuspended on ice in Ni<sup>2+</sup> wash buffer (20 mM  
1148 Tris pH 7.5, 20 mM Imidazole, 500mM NaCl) supplemented with 0.5 mM MgCl<sub>2</sub>, 1.4 mM  
1149 2-mercaptoethanol, 0.05% TWEEN-20, 400 U Bovine DNase I and 200 µL EDTA-free  
1150 protease inhibitors (Sigma-Aldrich) and lysed by passing through a TS series cells  
1151 disruptor (Constant Systems) at 24 kpsi. Lysates were cleared by centrifugation  
1152 (40,000×g, 30 min, 4°C) and incubated with NiNTA agarose (Qiagen) pre-equilibrated in



1153 Ni<sup>2+</sup> wash buffer for 60 min at 4°C. The resin was washed with >20 column volumes (cv)  
1154 of Ni<sup>2+</sup> wash buffer and protein was eluted in Ni<sup>2+</sup> elution buffer (20 mM Tris pH 7.5, 250  
1155 mM imidazole, 500mM NaCl) before being concentrated and applied to a Superdex 200  
1156 16/600 gel filtration column that had been pre-equilibrated in gel filtration buffer (20 mM  
1157 Tris, 200 mM NaCl, 1 mM DTT) at room temperature. Eluted fractions containing purified  
1158 His-GOPC were pooled, concentrated and small (<100 uL) aliquots were snap-frozen in  
1159 liquid nitrogen for storage at -80°C.

1160 For GST-UL56(1-207)-His, cells were resuspended on ice in 50 mM sodium  
1161 phosphate pH 7.6, 300 mM NaCl, 0.5 mM MgCl<sub>2</sub>, 1.4 mM 2-mercaptoethanol, 0.05%  
1162 TWEEN-20, 400 U Bovine DNase I and 200 µL EDTA-free protease inhibitors (Sigma-  
1163 Aldrich) before lysis and clarification as described above. Cleared lysates were incubated  
1164 with glutathione Sepharose 4B (GE Life Science) that had been pre-equilibrated in GSH  
1165 wash buffer (50 mM sodium phosphate pH 7.6, 300 mM NaCl, 1 mM DTT) for 1 h at 4°C.  
1166 The resin was washed with 10 cv of GSH wash buffer before being resuspended in 20 cv  
1167 of 25 mM sodium phosphate pH 7.5, 150 mM NaCl, 1 MgCl<sub>2</sub>, 0.5 mM DTT and incubated  
1168 at room temperature for 30 min with 50 U/mL benzonase nuclease (Sigma-Aldrich) to  
1169 digest co-purifying nucleic acids. The resin was then washed with 20 cv of 50 mM sodium  
1170 phosphate pH 7.6, 1 M NaCl to remove residual nucleotide binding before being washed  
1171 with a further 40 cv of GSH wash buffer. Protein was eluted using GSH wash buffer  
1172 supplemented with 25 mM reduced glutathione. The protein was then captured using  
1173 NiNTA agarose that had been equilibrated in Ni<sup>2+</sup> wash buffer, the resin was washed with  
1174 >20 cv of Ni<sup>2+</sup> wash buffer, and the protein eluted in Ni<sup>2+</sup> elution buffer before being  
1175 injected onto a 10/300 Superdex 200 gel filtration column (GE Healthcare) equilibrated in

1176 gel filtration buffer (as above). Eluted fractions containing UL56 were pooled,  
1177 concentrated and snap-frozen in small (<100  $\mu$ L) aliquots for storage at -80°C.

1178

#### 1179 *Protein GST pull-down assays*

1180 Bait proteins were diluted to 5  $\mu$ M in pull-down buffer (20 mM Tris pH 7.5, 200 mM  
1181 NaCl, 0.1% NP-40, 1 mM DTT, 1 mM EDTA) and, for each experiment, 200  $\mu$ L of bait  
1182 mixture was incubated for 15-30 min at room temperature with 10  $\mu$ L of glutathione  
1183 magnetic beads (Pierce) that had been pre-equilibrated in pull-down buffer. Supernatant  
1184 was removed and resin was washed twice with pull-down buffer. Bait-loaded resin was  
1185 incubated with purified His-GOPC (full-length or truncated) or clathrin N-terminal domain  
1186 (Muenzner et al., 2017) diluted to 10  $\mu$ M in pull-down buffer for 60 min at room  
1187 temperature in a final volume of 200  $\mu$ L per experiment. Unbound prey was removed and  
1188 the beads washed four times with pull-down buffer. Bound proteins were eluted using  
1189 pull-down buffer supplemented with 50 mM reduced glutathione. Samples were resolved  
1190 by SDS-PAGE and visualized using InstantBlue Coomassie stain (Expedeon).

1191

#### 1192 *Immunofluorescence microscopy*

1193 Cells were seeded to be a third confluent on #1.5 glass coverslips and transfected  
1194 with TransIT-LT1 or infected at MOI of 1 with crude virus stocks in complete media. At 1  
1195 day post-transfection or 6 hpi, the samples were fixed in 3% (v/v) formaldehyde PBS for  
1196 15 min at room temperature. Cells were permeabilized and washed using PBS  
1197 supplemented with 1% (v/v) FBS, 0.1% Triton-X100. If the primary antibody was from a  
1198 rabbit, a 2 h blocking step using PBS supplemented with 100  $\mu$ g/mL human IgG, 10%

1199 (v/v) FBS was included before incubation with the primary antibody. Antibodies were  
1200 diluted into PBS supplemented with 10% (v/v) FBS (plus 100 µg/mL human IgG for  
1201 antibodies raised in rabbit). After immunostaining, the coverslips were mounted with  
1202 ProLong Gold Antifade Mountant containing 4',6-diamidino-2-phenylindole (DAPI)  
1203 (ThermoFisher). Samples were analyzed with an inverted Olympus IX81 widefield  
1204 microscope. Illumination was performed with a Lumen 200 arc lamp (Prior Scientific) and  
1205 bandpass filters for DAPI (excitation of 350/50 nm and emission of 455/50 nm), Alexa  
1206 Fluor 488 (excitation of 490/20 nm and emission of 525/36 nm), and Alexa Fluor 568  
1207 (excitation of 572/35 nm and emission of 605/52 nm) (Chroma Technology Corp). Images  
1208 were acquired with Image-Pro Plus software (Media Cybernetics), a Retiga EXi Fast1394  
1209 interline CCD camera (QImaging), and a 60x PlanApo N oil objective (numerical aperture,  
1210 1.42) (Olympus) for a pixel resolution of 107.5 nm/pixel.

1211

#### 1212 *Generation of Flp-In<sup>TM</sup> T-REx<sup>TM</sup>-293 stable cells*

1213 The pUL56-inducible cell line was generated according to the manufacturer's  
1214 instructions. Briefly, pUL56 was cloned into pcDNA5/FRT/TO. Flp-In<sup>TM</sup> T-REx<sup>TM</sup>-293 cells  
1215 were transfected with pcDNA5/FRT/TO-pUL56 and the Flp recombinase expression  
1216 plasmid pOG44 using TransIT-LT1. One day post-transfection, the cells were selected in  
1217 100 µg/mL hygromycin and 15 mg/mL blasticidin. Single cell clones were then isolated  
1218 and screened for pUL56 expression. Expression of pUL56 was induced by incubating  
1219 cells with 1 µg/mL doxycycline 1 day prior to harvest.

1220

1221 *Virus growth curves, and plaque assays*

1222 Growth curves were performed using HaCaT cells infected in complete media with  
1223 crude virus stocks of HSV-1 WT or HSV-1  $\Delta$ UL56 at MOI of 10. After adsorption for 1 h  
1224 at 37°C, cells were incubated with acid wash (40 mM citric acid, 135 mM NaCl, 10 mM  
1225 KCl; pH 3.0) for 1 min and washed 3x with PBS before cell culture media was added back.  
1226 The time of acid wash was deemed 0 hpi. At various times post-infection, cells were  
1227 harvested by freezing the plate at -70°C. After freezing the last time point, samples were  
1228 freeze-thawed together 2 subsequent times and scraped before they were titred.  
1229 Titrations were performed on Vero monolayers. Cells were inoculated with serial dilutions  
1230 of the samples for 1 h, after which DMEM containing 0.3% high viscosity carboxymethyl  
1231 cellulose, 0.3% low viscosity carboxymethyl cellulose, 2% (v/v) FBS, 2 mM L-glutamine,  
1232 100 U/mL penicillin, and 100  $\mu$ g/mL streptomycin was overlaid. After 3 days, cells were  
1233 fixed in 3.75% (v/v) formaldehyde in PBS for 30 min and stained with 0.1% toluidine blue.

1234 For plaque size measurements, HaCaT, HFF hTERT, or Vero cells were grown in  
1235 6-well plates. The cells were infected and fixed as described above, but they were stained  
1236 with an anti-gD antibody (LP2). Plaques were visualized with a secondary antibody  
1237 conjugated to horseradish peroxidase and the DAB peroxidase substrate following the  
1238 manufacturer's instructions (Vector SK4105). Plaques were scanned at 300 dpi and  
1239 plaque diameters were measured with ImageJ (<https://imagej.nih.gov/ij/>).

1240

1241 *Plasma membrane profiling*

1242 SILAC labelled HaCaT cells (as described above) were grown in 15 cm dishes and  
1243 infected with gradient purified HSV-1 WT or HSV-1  $\Delta$ UL56 or mock infected in complete

1244 media at MOI 10. Plasma membrane profiling was performed as described previously  
1245 with minor modifications (Weekes et al., 2010). Briefly, at 6 hpi cells were washed, surface  
1246 sialic acid residues oxidized with sodium-meta-periodate and labelled with aminoxy-  
1247 biotin. The reaction was quenched and the biotinylated cells scraped into 1% (v/v) Triton  
1248 X-100 lysis buffer. Biotinylated glycoproteins were enriched with high affinity streptavidin  
1249 agarose beads and washed extensively. Captured protein was denatured with DTT,  
1250 alkylated with iodoacetamide (IAA) and digested on-bead with trypsin in 100 mM HEPES  
1251 pH 8.5 for 3 h. Tryptic peptides were collected and fractionated by tip-based SCX strong  
1252 cation exchange, generating six fractions for MS analysis.

1253

#### 1254 *LC-MS/MS for plasma membrane experiments*

1255 Mass spectrometry data was acquired using an Orbitrap Lumos (Thermo Fisher  
1256 Scientific, San Jose, CA). An Ultimate 3000 RSLC nano UHPLC equipped with a 300 µm  
1257 ID x 5 mm Acclaim PepMap µ-Precolumn (Thermo Fisher Scientific) and a 75 µm ID x 50  
1258 cm 2.1 µm particle Acclaim PepMap RSLC analytical column was used. Loading solvent  
1259 was 0.1% FA, analytical solvent A: 0.1% FA and B: 80% (v/v) MeCN + 0.1% FA. All  
1260 separations were carried out at 55°C. Samples were loaded at 5 µL/min for 5 min in  
1261 loading solvent before beginning the analytical gradient. The following gradient was used:  
1262 3-7% B over 4 min, 7-37% B over 116 min, followed by a 4-min wash at 95% B and  
1263 equilibration at 3% B for 15 min. Each analysis used an MS2 DDA acquisition using the  
1264 following settings: MS1: 375-1500 Th, 60,000 Resolution,  $4 \times 10^5$  automatic gain control  
1265 (AGC) target, 50 ms maximum injection time. MS2: Quadrupole isolation at an isolation

1266 width of m/z 1.6, HCD fragmentation (normalised collision energy (NCE) 35) with ion trap  
1267 scanning in rapid mode from m/z 110,  $1 \times 10^4$  AGC target, 35 ms maximum injection time.

1268 The resulting spectra were processed in Maxquant 1.5.8.3 using medium (Arg6,  
1269 Lys4) and heavy (Arg10, Lys8) labels. Data was searched against the human and HSV-  
1270 1 strain KOS proteomes as used for TMT analysis (above). Carbamidomethyl (C) was set  
1271 as a fixed modification, oxidation (M) and acetylation (protein N termini) set as variable  
1272 modifications. Protein and peptide FDR were both set to 0.01, re-quantify was enabled  
1273 and minimum ratio count was set to 2. Hierarchical centroid clustering based on  
1274 uncentered Pearson correlation of the normalised ratios generated by MaxQuant was  
1275 performed using Cluster 3.0 (Stanford University) and visualised with Java Treeview  
1276 (<http://jtreeview.sourceforge.net>).

1277

#### 1278 *Generation of CRISPR knockout HaCaT cells*

1279 HaCaT cells were seeded at 50% confluence and transfected with the PX459  
1280 CRISPR plasmid containing relevant guide RNAs (GOPC 1:  
1281 GGAACATGGATACCCCGCCA; GOPC 2: GAGAGATCGATCCAGACCAAG) and  
1282 Lipofectamine 2000 according to the manufacturer's instructions. pSpCas9(BB)-2A-Puro  
1283 (PX459) V2.0 was a gift from Feng Zhang (Addgene plasmid # 62988;  
1284 <http://n2t.net/addgene:62988>; RRID:Addgene\_62988) (Ran et al., 2013). One day post-  
1285 transfection the medium was changed to contain 2  $\mu$ g/mL puromycin, and 3 days post-  
1286 transfection the medium was changed to selection-free medium. Clonal cell lines were  
1287 expanded and tested for loss of GOPC by western blot analysis and genomic sequencing.

1288

1289 *Flow Cytometry*

1290 HaCaT cells infected with crude virus stocks were washed 2 times with PBS and  
1291 detached with accutase. Cells were pelleted at 400×g for 5 min and washed once with  
1292 PBS containing 2% (v/v) FBS. For extracellular staining, cells were stained with anti-  
1293 human CD282 (TLR2) antibody (BioLegend, 153003) and incubated for 1 h at room  
1294 temperature. Stained cells were washed once and fixed in 4% (v/v) formaldehyde in PBS  
1295 for 20 min at room temperature. Data was acquired with a FACSCalibur and analyzed  
1296 with Flowing Software version 2.5.1 (<http://flowingsoftware.btk.fi/>).

1297

1298 *RT PCR quantification*

1299 Cells infected with crude virus stocks were harvested by scraping and  
1300 centrifugation at 200×g for 5 min. They were washed once in PBS before lysis buffer was  
1301 added (4 M guanidinium thiocyanate, 25 mM Tris pH 7). After 10 min on ice, an equal  
1302 volume of 100% ethanol was added and this was loaded onto a spin column. Columns  
1303 were washed once with 1 M guanidinium thiocyanate, 25 mM Tris pH 7, 10% (v/v) ethanol  
1304 and twice with 25 mM Tris pH 7, 70% (v/v) ethanol before being eluted with water.  
1305 Samples were treated with RQ1 DNase according to the manufacturer's instructions with  
1306 RNaseOUT. Reverse transcription was performed with M-MLV RT and a random  
1307 hexamer primer mix, and PCR was carried out with Phusion DNA polymerase. RT PCR  
1308 products were visualized with a 1% (w/v) agarose TAE gel with 1 µg/mL ethidium bromide.  
1309 Image acquisition was achieved with a G:BOX gel imager with control software  
1310 GeneSnap v7.12.06.

1311

1312 *Data availability*

1313           The mass spectrometry proteomics data will be deposited with the  
1314 ProteomeXchange Consortium (<http://www.proteomexchange.org/>) via the PRIDE  
1315 partner repository under the data set identifier PXDxxxxxx  
1316 (<http://www.ebi.ac.uk/pride/archive/projects/PXDxxxxxx>).

1317           Unprocessed peptide data files for Figures 1, 3, 5 and 6 are available at doi:  
1318 <https://data.mendeley.com/datasets/g5sf93zwtf/1>
